# Supplementary material for: The environmental biorefinery: state-of-the-art on the production of hydrogen and value-added biomolecules in mixed-culture fermentation
Source: Royal Society of Chemistry journal article supplement (doi:10.1039/c8gc00572a), 2018-01-01
Supplement: c8gc00572a1.pdf [file c8gc00572a1.pdf]

## Supplementary information

### The environmental biorefinery: state of the art on the production of hydrogen and value-added biomolecules in mixed-culture fermentation

Roman Moscoviz<sup>a,b</sup>, Eric Trably<sup>a,\*</sup>, Nicolas Bernet and Hélène Carrère<sup>a</sup>

\*Corresponding author: *eric.trably@inra.fr*

<sup>a</sup> LBE, Univ Montpellier, INRA, 102 Avenue des étangs, 11100 Narbonne, France

<sup>b</sup> Consortium de Valorisation Thématique de l'Alliance ANCRE, Bâtiment Le Ponant D, 25 rue Leblanc, 75015 Paris, France

(E-mail: *roman.moscoviz@gmail.com*; *eric.trably@inra.fr*; *nicolas.bernet@inra.fr*; *helene.carrere@inra.fr*)

Table S1: Technology readiness level (TRL) scale according to the European Commission

| TRL | Description                                                                                                                  |
|-----|------------------------------------------------------------------------------------------------------------------------------|
| 1   | Basic principles observed                                                                                                    |
| 2   | Technology concept formulated                                                                                                |
| 3   | Experimental proof of concept                                                                                                |
| 4   | Technology validated in lab                                                                                                  |
| 5   | Technology validated in relevant environment (industrially relevant environment in the case of key enabling technologies)    |
| 6   | Technology demonstrated in relevant environment (industrially relevant environment in the case of key enabling technologies) |
| 7   | System prototype demonstration in operational environment                                                                    |
| 8   | System complete and qualified                                                                                                |
| 9   | Actual system proven in operational environment (competitive manufacturing in the case of key enabling technologies)         |

Table S2: Patent database

| Priority date | Title                                                                                                                                                                                                       | Patent number                                   | Patent status                            |
|---------------|-------------------------------------------------------------------------------------------------------------------------------------------------------------------------------------------------------------|-------------------------------------------------|------------------------------------------|
| 2015          | System and method for bio-electrochemical water oxidation                                                                                                                                                   | EP3075884 A1;                                   | Application (EP)                         |
| 2015          | Food waste fermentation device using soil microbes and livestock manure composting device, biofield generator suitable for same, microbial cell suitable for same and microbial condenser suitable for same | WO2016129846 A1;                                | Application (WO)                         |
| 2015          | Processing of biomass materials                                                                                                                                                                             | WO2016160955 A1;                                | Application (WO)                         |
| 2015          | Process for producing polyhydroxyalkanoates from precursors obtained by anaerobic fermentation from fermentable biomass                                                                                     | US2016251474 A1; WO2016135396 A1; FR3033168 B1; | Application (US; WO)<br>Active (FR 2017) |
| 2014          | Conversion of biomass, organic waste and carbon dioxide into synthetic hydrocarbons                                                                                                                         | US2016186072 A1; WO2016101076 A1;               | Application (US; WO)                     |
| 2014          | Maximizing production of hydrogen from waste materials by active removal of hydrogen                                                                                                                        | WO2016040074 A1;                                | Application (WO)                         |
| 2014          | Device for high-efficiency biological hydrogen and methane production                                                                                                                                       | TW201602017 A;                                  | Application (TW)                         |
| 2014          | Method for producing hydrogen by means of dark fermentation from biomass from the wine-producing industry, without using a microbial consortium                                                             | WO2016030623 A1;                                | Application (WO)                         |
| 2014          | Processes for controlling the concentration of co-produced oxygenated organics in anaerobic fermentation broths for the bioconversion of syngas to product oxygenated organic compound                      | US2016010123 A1; WO2016007659 A1;               | Application (US; WO)                     |
| 2014          | Microorganism co-culture system and uses of the same                                                                                                                                                        | US2016068919 A1; CN105400860 A; TW201610165 A;  | Application (US; CN; TW)                 |

|      |                                                                                                                                                                                 |                                                                                                                                                                                                                               |                                                                                                     |
|------|---------------------------------------------------------------------------------------------------------------------------------------------------------------------------------|-------------------------------------------------------------------------------------------------------------------------------------------------------------------------------------------------------------------------------|-----------------------------------------------------------------------------------------------------|
| 2014 | Biofilm process for treating water with continuous or semi-continuous production of biomass with enhanced polyhydroxyalkanoate content                                          | WO2016020816 A3;                                                                                                                                                                                                              | Application (WO)<br>Withdrawn (EP 2017)                                                             |
| 2014 | Wastewater treatment method                                                                                                                                                     | TW201545995 A;                                                                                                                                                                                                                | Application (TW)                                                                                    |
| 2014 | The production of hydrogen and other gaseous or liquid products in an accelerated bioprocess                                                                                    | CA2944425 A1; WO2015158950 A1;                                                                                                                                                                                                | Application (CA; WO)                                                                                |
| 2014 | Process for producing biohydrogen and biomethane                                                                                                                                | MD4362 C1;                                                                                                                                                                                                                    | Active (MD 2016)                                                                                    |
| 2014 | Process for phototrophic production of phas and h2 gas from wide range of organic waste                                                                                         | WO2015123522 A1;                                                                                                                                                                                                              | Application (WO)                                                                                    |
| 2014 | A method for improving the methane production rate through acidification pretreatment of hydrogen production of kitchen waste and sludge                                        | CN104561222 A; WO2015143906 A1;                                                                                                                                                                                               | Application (CN; WO)                                                                                |
| 2013 | Facilities for resource-recycling biotechnical hydrogen production from biomass                                                                                                 | JP2015089945 A;                                                                                                                                                                                                               | Application (JP)                                                                                    |
| 2013 | Biohydrogen production method and reactor                                                                                                                                       | US2015111273 A1; CA2926577 A1;<br>WO2015058295 A1; BR112016008913 A1;<br>AU2014339713 A1; SG11201603032X A;<br>KR20160068965 A; CN105722986 A;<br>IL245228 A; EP3060672 A1;<br>IN201617015900 A; VN48590 A;<br>CU20160053 A7; | Application (US; CA; WO;<br>BR; AU; SG; KR; CN; IL; IN;<br>CU)<br>Withdrawn (EP 2017)               |
| 2013 | Circulatory bio hydrogen production facility using biomass                                                                                                                      | JP2015025172 A;                                                                                                                                                                                                               | Application                                                                                         |
| 2013 | Method and system for production of hydrogen, methane, volatile fatty acids, and alcohols from organic material                                                                 | CA2919263 A1; WO2015010192 A1;<br>BR112016001701 A1; EP3024940 A1;<br>US2016186218 A1; IN201617004244 A;<br>JP2016532441 A;                                                                                                   | Application (CA; WO; BR;<br>IN; JP)<br>Active (US 2017)<br>Withdrawn (EP 2017)                      |
| 2013 | Bioelectrochemical system having polyvalent ion removing function                                                                                                               | WO2014196825 A1; EP3006407 A1;<br>CN105555715 A; US2016137536 A1;                                                                                                                                                             | Application (WO; EP; CN;<br>US)                                                                     |
| 2013 | Hydrogen production from dark fermentation of high-protein material under anaerobic condition                                                                                   | KR20140112292 A; KR101472379 B1;                                                                                                                                                                                              | Active (KR 2014)                                                                                    |
| 2013 | Method and plant for continuously producing hydrogen (h2) and methane (ch4) from zootechnical effluents                                                                         | WO2014147558 A1; EP2976430 A1;                                                                                                                                                                                                | Application (WO; EP)                                                                                |
| 2013 | Digester assemblies to provide renewable resources                                                                                                                              | US2014273196 A1; WO2014160252 A1;<br>US9127244 B2;                                                                                                                                                                            | Application (WO)<br>Active (US 2015)                                                                |
| 2013 | Method for production of n-propanol and other c3-carbon containing products from syngas by symbiotic arrangement of c1-fixing and c3-producing anaerobic microorganism cultures | US2014273123 A1; WO2014140336 A1;<br>CN105722987 A;                                                                                                                                                                           | Application (US; WO; CN)                                                                            |
| 2013 | Method for producing hydrocarbides                                                                                                                                              | CA2908125 A1; WO2014170603 A1;<br>FR3004727 B1; BR112015026341 A1;<br>CN105264120 A; EP2986758 A1;<br>US2016068866 A1;                                                                                                        | Application (CA; WO; BR;<br>CN; EP)<br>Active (FR 2015; US 2017)                                    |
| 2013 | Method for producing ethanol from organic waste, and facility for implementing said method                                                                                      | WO2014108653 A1; FR3000965 B1;<br>EP2943574 A1;                                                                                                                                                                               | Application (WO; EP)<br>Active (FR 2015)                                                            |
| 2013 | Method for producing hydrogen gas using thermophilic granulated microorganism complex and hydrogen produced thereby                                                             | KR101299115 B1;                                                                                                                                                                                                               | Active (KR 2013)                                                                                    |
| 2013 | Enhanced sewage biological nitrogen and phosphorus removal method based on polyhydroxyalkanoates metabolic regulation                                                           | CN103332829 B; WO2015000266 A1;<br>EP3018105 A1;                                                                                                                                                                              | Application (WO; EP)<br>Active (CN 2015)                                                            |
| 2012 | Production of hydrogen using an anaerobic biological process                                                                                                                    | US2014157777 A1; US9506084 B2;                                                                                                                                                                                                | Active (US 2016)                                                                                    |
| 2012 | Microbial consortium for the production of hydrogen                                                                                                                             | WO2014033345 A1; ES2456776 B1;                                                                                                                                                                                                | Application (WO)<br>Active (ES 2015)                                                                |
| 2012 | Microbial electrosynthetic cells                                                                                                                                                | CA2880297 A1; WO2014043690 A1;<br>EP2895594 A4; US2015259669 A1;                                                                                                                                                              | Application (CA; WO)<br>Active (US 2018)<br>Withdrawn (EP 2017)                                     |
| 2012 | Method for producing c2 oxygenates by fermentation using high oxidation state sulfur                                                                                            | CA2877566 A1; US2014017747 A1;<br>WO2014011867 A1; BR112014004951 A1;<br>US2014220649 A1; AU2013290132 B2;<br>CN104619849 A; EP2872638 A4;<br>MX2015000452 A; US9212375 B2;<br>RU2015104355 A;                                | Application (CA; WO; BR;<br>CN; MX)<br>Active (US 2015; AU 2017;<br>RU 2018)<br>Withdrawn (EP 2018) |
| 2012 | A fermentation process                                                                                                                                                          | CA2892303 C; WO2014088427 A1;<br>AU2012396327 A1; BR112015013011 A1;<br>KR20150091110 A; EP2929038 A4;<br>CN104995306 A; US2015337343 A1;<br>IN4745DELNP2015 A; JP2016500258 A;<br>EA201591043 A1;                            | Application (WO; KR; EP;<br>CN; US; IN; JP; EA)<br>Active (CA 2016; AU 2017)                        |
| 2012 | System and Method for Producing Ethanol and Biogas                                                                                                                              | CA2823196 A1; US2014065685 A1;<br>BR102013021902 A2;                                                                                                                                                                          | Active (BR 2015)<br>Withdrawn (CA 2014; US 2014)                                                    |
| 2012 | Microbial electrolysis cells and methods for the production of                                                                                                                  | US2013256149 A1; US9216919 B2;                                                                                                                                                                                                | Active (US 2015)                                                                                    |

|                   |                                                                                                                                                                 |                                                                                                                                                                                  |                                                                                                          |
|-------------------|-----------------------------------------------------------------------------------------------------------------------------------------------------------------|----------------------------------------------------------------------------------------------------------------------------------------------------------------------------------|----------------------------------------------------------------------------------------------------------|
| chemical products |                                                                                                                                                                 |                                                                                                                                                                                  |                                                                                                          |
| 2012              | Anaerobic treatment method and device of organic waste                                                                                                          | JP2013013896 A; JP5711192 B2;                                                                                                                                                    | Active (JP 2015)                                                                                         |
| 2012              | Process for anaerobic production of biohydrogen from organic waste                                                                                              | MD4217 C1;                                                                                                                                                                       | Active (MD 2013)                                                                                         |
| 2012              | Method for producing lactic acid using continuous anaerobic reactors                                                                                            | KR101271005 B1;                                                                                                                                                                  | Active (KR 2013)                                                                                         |
| 2012              | Treatment of biomass                                                                                                                                            | CA2867650 A1; WO2013128390 A1; AU2013227278 B2; SG11201405057Y A; EP2820139 A4; KR20150004796 A; US2015050707 A1; CN104379754 A; JP2015515262 A; HK1205759 A1;                   | Application (CA; WO; EP; US; CN; JP; HK)<br>Active (AU 2017; SG 2018)<br>Withdrawn (KR 2018)             |
| 2012              | Method and system for electro-assisted hydrogen production from organic material                                                                                | CA2860463 A1; US2013217089 A1; WO2013120206 A1; AU2013220906 B2; BR112014020962 A1; CN104245944 A; EP2814971 A4; IN7590DEN2014 A; US9458474 B2; US2016333379 A1;                 | Application (CA; WO; BR; CN; EP; IN)<br>Active (US 2016; AU 2016)                                        |
| 2012              | Method for improving production of bio-hydrogen from waste water containing protein                                                                             | CN102747106 B; WO2014005484 A1; US2015184200 A1;                                                                                                                                 | Application (WO)<br>Active (CN 2013; US 2017)                                                            |
| 2011              | Development of a combined biohydrogen and methane production unit using two-stage anaerobic co-digestion process                                                | IN4505CHE2011 A;                                                                                                                                                                 | Application (IN)                                                                                         |
| 2011              | Method and apparatus for anaerobically digesting organic material                                                                                               | US2013137153 A1;                                                                                                                                                                 | Application (US)                                                                                         |
| 2011              | Crude glycerol fermenting process for the production of ethanol and hydrogen                                                                                    | ITRM20110480 A1; WO2013038435 A1; EP2756088 A1; US2014295515 A1;                                                                                                                 | Application (WO)<br>Withdrawn (EP 2017; US 2016)                                                         |
| 2011              | Pre-thermal treatment of microalgae and high temperature and high efficiency hydrogen/methane fermentation process using waste heat of power-plant effluent gas | KR101181834 B1;                                                                                                                                                                  | Active (KR 2012)                                                                                         |
| 2011              | Treatment method and treatment apparatus of organic waste                                                                                                       | JP2012183510 A; JP5726576 B2;                                                                                                                                                    | Active (JP 2015)                                                                                         |
| 2011              | Apparatus for producing biohydrogen and biomethane from organic substance                                                                                       | LV14431 B;                                                                                                                                                                       | Active (2012)                                                                                            |
| 2011              | Method and apparatus for manufacturing a hydroxycarboxylic acid product and use of bleaching filtrate                                                           | FI20115496 A; WO2012160255 A1; UY34085 A;                                                                                                                                        | Application (FI; WO; UY)                                                                                 |
| 2010              | PROCESS FOR PRODUCTION OF HYDROGEN AND VOLATILE GREASY ACIDS                                                                                                    | BRPI1005215 A8;                                                                                                                                                                  | -                                                                                                        |
| 2010              | Methods and systems for the production of alcohols and/or acids                                                                                                 | CA2789333 C; CA2836686 C; WO2012054806 A3; TW201231669 A; AU2011316899 B2; US2013112576 A1; CN103270164 B; EA201390593 A1; US2013316411 A1; EA024224 B1;                         | Application (WO)<br>Active (CA 2015; AU 2014; CN 2016; EA 2016)                                          |
| 2010              | Bio-electrochemical systems                                                                                                                                     | WO2012054629 A3; EP2630088 A4; US2014069806 A1;                                                                                                                                  | Application (WO; US)<br>Active (EP 2017)                                                                 |
| 2010              | hydrogen and methane gas producing device using two phase anaerobic digestion reactor                                                                           | KR20120033081 A; KR101185225 B1;                                                                                                                                                 | Active (KR 2012)                                                                                         |
| 2010              | Method of treating municipal wastewater and producing biomass with biopolymer production potential                                                              | CA2808142 A1; WO2012023114 A1; AU2011292811 B2; KR20130048248 A; EP2606007 A1; US2013199997 A1; CN103298753 B; JP2013537483 A; BR112013003609 A2; KR20150141194 A; JP5855102 B2; | Application (CA; WO; BR)<br>Active (CN 2015; JP 2016; Withdrawn (EP 2017; US 2017)<br>Rejected (KR 2016) |
| 2010              | Method for producing energy-rich gases from lignocellulosic material streams                                                                                    | WO2012003556 A1; BR112012016005 A2;                                                                                                                                              | Application (WO, BR)                                                                                     |
| 2010              | Continuous Process and device of production of ethanol from [organico] garbage and other residues of biomass                                                    | BRPI1000194 A2;                                                                                                                                                                  | Application (BR)                                                                                         |
| 2010              | Production of polyhydroxyalkanoates                                                                                                                             | GB201004096 D0; GB2478588 A; WO2011112154 A1; AU2011224898 A1; SG184015 A1; EP2545179 A4; JP2013521802 A; US2013164800 A1;                                                       | Application (WO, AU, SG)<br>Withdrawn (GB 2015; EP 2014; US 2014)<br>Rejected (JP 2014)                  |
| 2009              | A bioelectrochemical cell system                                                                                                                                | WO2011011829 A1; AU2010278674 A1;                                                                                                                                                | Application (WO; AU)                                                                                     |
| 2009              | Alcohol production process                                                                                                                                      | WO2011002318 A1; US2011212433 A1; EP2449121 A4; CN102471783 A; KR20120055549 A; US2013252230 A1; US8906655 B2; IN646DEN2012 A;                                                   | Application (WO; EP; CN; IN)<br>Active (KR 2017; US 2014)                                                |
| 2009              | Bio-electrochemical device and method for upgrading a fluid                                                                                                     | NL2003812 C; WO2011062485 A3; EP2502301 A2;                                                                                                                                      | Application (WO)<br>Active (NL 2011)<br>Withdrawn (EP 2017)                                              |
| 2009              | A method for dihydrogen gas production                                                                                                                          | TW201107480 A; TWI406949 B;                                                                                                                                                      | Active (TW 2013)                                                                                         |
| 2009              | Methods for selectively producing hydrogen and methane                                                                                                          | US2011033908 A1; WO2011017292 A1;                                                                                                                                                | Application (WO; AR)                                                                                     |

|      |                                                                                                                                                                                                                             |                                                                                                                                                                                                                                     |                                                                                                                |
|------|-----------------------------------------------------------------------------------------------------------------------------------------------------------------------------------------------------------------------------|-------------------------------------------------------------------------------------------------------------------------------------------------------------------------------------------------------------------------------------|----------------------------------------------------------------------------------------------------------------|
|      | from biomass feedstocks using an anaerobic biological system                                                                                                                                                                | AR077702 A1; US8246828 B2;                                                                                                                                                                                                          | Withdrawn (US 2016)                                                                                            |
| 2009 | Improved fermentation of gaseous substrates                                                                                                                                                                                 | WO2011028137 A1; TW201114886 A;<br>US2011244538 A1; AU2010290201 B2;<br>US8178330 B2; CN102498214 B;<br>EP2519641 B1; NZ598279 A; TW1490328 B;                                                                                      | Application (WO)<br>Active (US 2012; AU 2013;<br>CN 2013; EP 2014; NZ 2013;<br>TW 2015)                        |
| 2009 | Process for the production of polyhydroxyalkanoates                                                                                                                                                                         | WO2011031566 A1; US2012165500 A1;                                                                                                                                                                                                   | Application (WO)<br>Withdrawn (US 2014)                                                                        |
| 2009 | Diphasic algal culture system                                                                                                                                                                                               | WO2010150190 A3; AU2010264093 B2;<br>AP201206098 D0; IN0165MUMNP2012 A;<br>CN102575209 B; ZA201200430 B; AP3236<br>A;                                                                                                               | Application (WO; IN)<br>Active (CN 2016; ZA 2014)<br>Withdrawn (AU 2018)                                       |
| 2009 | Microbial electrolytic cell                                                                                                                                                                                                 | WO2010117864 A1; US2012082869 A1;                                                                                                                                                                                                   | Application (WO)<br>Withdrawn (US 2014)                                                                        |
| 2009 | System and method for producing hydrogen and methane                                                                                                                                                                        | KR100967919 B1;                                                                                                                                                                                                                     | Active (KR 2010)                                                                                               |
| 2009 | Method for energetic, waste-free recycling of vegetable raw materials, which are converted into energy source e.g. ethanol and methane and into a fertilizer, comprises hydrolyzing vegetable raw materials, and fermenting | DE102009024423 A1;                                                                                                                                                                                                                  | Withdrawn (DE 2012)                                                                                            |
| 2009 | Semi-continuous process for hydrogen production from organic waste                                                                                                                                                          | EP2246436 A1;                                                                                                                                                                                                                       | Withdrawn (EP 2011)                                                                                            |
| 2009 | Method for treating glycerol                                                                                                                                                                                                | JP2010193767 A;                                                                                                                                                                                                                     | Application (JP)                                                                                               |
| 2009 | System and method for hydrogen production                                                                                                                                                                                   | KR100941214 B1;                                                                                                                                                                                                                     | Active (KR 2010)                                                                                               |
| 2009 | Integrated system for hydrogen and methane production from industrial organic wastes and biomass                                                                                                                            | CA2751046 A1; WO2010085893 A1;<br>AU2010207871 B2; EP2391706 A4;<br>CN102300977 B; US2012009643 A1;<br>IN1716MUMNP2011 A; BRPI1007417 A2;<br>US8900840 B2; US2014370587 A1;<br>US2016068794 A1; US9303242 B2;                       | Application (WO; EP; IN; BR)<br>Active (CA 2017; AU 2015;<br>CN 2015; US 2014)                                 |
| 2009 | Compositions and methods for conversion of lignocellulosic material to fermentable sugars and products produced therefrom                                                                                                   | CA2755449 C; WO2010107944 A1;<br>US2010248320 A1; AU2010226673 A1;<br>EP2408924 A1; TR201109113 T1;<br>CN102449156 A; VN29679 A;<br>MX2011009745 A; JP2012520682 A;<br>BRPI1012700 A2; TH120309 A;<br>RU2011139512 A; US8658407 B2; | Application (WO; AU; TR;<br>CN; VN; MX; JP; BR; TH;<br>RU)<br>Active (CA 2015; US 2014)<br>Withdrawn (EP 2013) |
| 2009 | Bioreactor process for production of hydrogen from biomass                                                                                                                                                                  | WO2010131224 A3; EP2430145 A2;<br>US2012088266 A1; CN102459563 B;<br>IN9826DELNP2011 A; US9222108 B2;                                                                                                                               | Application (WO; IN)<br>Active (EP 2017; US 2015;<br>CN 2016)                                                  |
| 2009 | Method for recovering and producing ethanol and oil                                                                                                                                                                         | WO2010084589 A1; KR20110105838 A;<br>EP2390014 A4; CN102292170 B;<br>US2012034667 A1; BRPI0924092 A1;<br>US8722372 B2; KR101612875 B1;                                                                                              | Application (WO; EP; BR)<br>Active (KR 2016; CN 2014;<br>US 2014)                                              |
| 2008 | Process for the production of chemicals                                                                                                                                                                                     | CA2747212 A1; WO2010068994 A1;<br>AU2009328649 A1; EP2373832 A1;<br>CN102282295 A; US2011315560 A1;<br>JP2012512326 A; BRPI0923180 A1;                                                                                              | Application (WO; CN; JP;<br>BR)<br>Withdrawn (CA 2014; AU<br>2014; EP 2014; US 2015)                           |
| 2008 | Production of methanol or methanol derivatives                                                                                                                                                                              | WO2010068979 A1;                                                                                                                                                                                                                    | Application (WO)                                                                                               |
| 2008 | Microbial electrolytic cell                                                                                                                                                                                                 | WO2010045072 A3;                                                                                                                                                                                                                    | Application (WO)                                                                                               |
| 2008 | Three stage, multiple phase anaerobic digestion system and method                                                                                                                                                           | CA2732681 A1; WO2010014919 A1;<br>US2011136213 A1; US8765449 B2;<br>US2014315292 A1;                                                                                                                                                | Application (WO)<br>Active (US 2014)<br>Withdrawn (CA 2014)                                                    |
| 2008 | Biomass alcohol manufacturing method                                                                                                                                                                                        | WO2009122728 A1; US2011053234 A1;<br>JP5142347 B2; US8993283 B2;                                                                                                                                                                    | Application (WO)<br>Active (US 2015; JP 2013)                                                                  |
| 2008 | Production of hydrogen and/or ethanol by the anaer                                                                                                                                                                          | TW200936762 A; TWI354704 B;                                                                                                                                                                                                         | Active (TW 2011)                                                                                               |
| 2008 | Alcohol production process                                                                                                                                                                                                  | US2009275787 A1; US8119844 B2;                                                                                                                                                                                                      | Active (US 2012)                                                                                               |
| 2008 | Systems and methods for anaerobic digestion and collection of products                                                                                                                                                      | GB0915377 D0; GB2464585 B;<br>AU2009308085 B2; CA2741199 C;<br>WO2010047815 A3; AP201105689 D0;<br>EP2361229 A4; CN102227383 B;<br>HK1143609 A1; US2014154754 A1; AP3504<br>A;                                                      | Application (WO; AP; EP;<br>HK)<br>Active (GB 2012; AU 2014;<br>CA 2016; CN 2014)                              |
| 2007 | Method and apparatus for membrane-based, two-stage gas production from solid biomaterials                                                                                                                                   | US8093041 B1; US2012107895 A1;<br>US8343749 B2;                                                                                                                                                                                     | Active (US 2013)                                                                                               |
| 2007 | Method and device for microbial production of a certain product and methane                                                                                                                                                 | DE102007048277 A1; WO2009047275 A8;<br>EP2198034 A2; CN101861394 A;<br>US2010285548 A1; BRPI0818613 A1;<br>US8426162 B2;                                                                                                            | Application (WO; CN; BR)<br>Withdrawn (DE 2012; EP<br>2014)<br>Active (US 2013)                                |

|      |                                                                                                                                                                                                                                           |                                                                                                                                                                                                                                                                                                                                        |                                                                                                                        |
|------|-------------------------------------------------------------------------------------------------------------------------------------------------------------------------------------------------------------------------------------------|----------------------------------------------------------------------------------------------------------------------------------------------------------------------------------------------------------------------------------------------------------------------------------------------------------------------------------------|------------------------------------------------------------------------------------------------------------------------|
| 2007 | Microbial hydrogen-producing process and system thereof                                                                                                                                                                                   | US2009035812 A1; TW200907051 A;<br>US8003344 B2;                                                                                                                                                                                                                                                                                       | Active (US 2011)<br>Rejected (TW 2011)                                                                                 |
| 2007 | Method for producing hydrogen from organic wastes                                                                                                                                                                                         | US2008277337 A1; US7901916 B2;                                                                                                                                                                                                                                                                                                         | Active (US 2011)                                                                                                       |
| 2007 | Method for producing bio-hydrogen using iron dust                                                                                                                                                                                         | KR100853715 B1;                                                                                                                                                                                                                                                                                                                        | Active (KR 2008)                                                                                                       |
| 2007 | Alcohol production process                                                                                                                                                                                                                | WO2008115080 A1; NZ553984 A;<br>US2010105115 A1; US8293509 B2;                                                                                                                                                                                                                                                                         | Application (WO)<br>Active (NZ 2009; US 2012)                                                                          |
| 2007 | A system for bioelectrochemical hydrogen production using sun light                                                                                                                                                                       | KR100841736 B1;                                                                                                                                                                                                                                                                                                                        | Active (KR 2008)                                                                                                       |
| 2007 | Concurrent anaerobic digestion and fermentation of lignocellulosic feedstocks                                                                                                                                                             | AU2008255540 B2; CA2687916 C;<br>WO2008144903 A1; EP2158167 A4;<br>CN101711229 B; JP2010528593 A;<br>US2011236946 A1; NZ581476 A;<br>IN8516DELNP2009 A; BRPI0812072 A2;                                                                                                                                                                | Application (WO; IN; BR)<br>Active (AU 2014; CA 2016;<br>CN 2012)<br>Withdrawn (EP 2014; JP 2013;<br>US 2015; NZ 2015) |
| 2007 | Membrane supported bioreactor for conversion of syngas components to liquid products                                                                                                                                                      | US2008305539 A1; US2008305540 A1;<br>WO2008154301 A1; US2009017514 A1;<br>US2009029434 A1; US2009104676 A1;<br>US2010047886 A1; WO2010048421 A3;<br>US7923227 B2; WO2011068576 A1;<br>US2011183390 A1; US8017384 B2;<br>CN102197138 B; US2011256597 A1;<br>US8101387 B2; US8198055 B2; US8541214 B2;<br>US8828692 B2; US2014377822 A1; | Application (WO)<br>Active (US 2012; CN 2014)                                                                          |
| 2007 | Energy efficient methods to produce products                                                                                                                                                                                              | AU2008212826 A1; CA2676982 A1;<br>US2008193989 A1; WO2008098254 A3;<br>MX2009008496 A; EP2121946 A4;<br>CN101646776 A; JP2010517581 A;<br>BRPI0806417 A2; NZ578813 A; US8329436 B2;<br>US2013189752 A1;                                                                                                                                | Application (WO; CN; JP; BR)<br>Active (US 2012; MX 2013)<br>Withdrawn (AU 2014; CA 2014; EP 2014; NZ 2015)            |
| 2007 | Process for the poduction of biogas and amino acids from a hydrolysate                                                                                                                                                                    | EP1980620 B1; DE102007017184 A1;<br>CN101307333 B; BRPI0801142 A2;<br>US2009098598 A1; US8318465 B2;<br>DK1980620 T3; ES2542692 T3;                                                                                                                                                                                                    | Application (DE ; BR)<br>Active (EP 2015; CN 2014;<br>US 2012; DK 2015; ES 2015)                                       |
| 2007 | Apparatus and method for biohydrogen production                                                                                                                                                                                           | GB0705583 D0; US2008233624 A1;                                                                                                                                                                                                                                                                                                         | Withdrawn (GB 2011; US 2011)                                                                                           |
| 2006 | Production of hydrogen and methane from wastewater streams                                                                                                                                                                                | WO2008081292 A3; EP2109589 B1;<br>ZA200903628 B; ES2477329 T3;                                                                                                                                                                                                                                                                         | Application (WO)<br>Active (ZA 2010; EP 2014; ES 2014)                                                                 |
| 2006 | Process and apparatus for producing hydrogen from sewage sludge                                                                                                                                                                           | US2008152967 A1; WO2008083008 A1;<br>IN4443CHENP2009 A; EP2132362 A4;                                                                                                                                                                                                                                                                  | Application (WO)<br>Withdrawn (US 2012; IN 2017; EP 2013)                                                              |
| 2006 | Hydrogen production method for increasing hydrogen production yield using a trickling bed reactor                                                                                                                                         | KR100813151 B1;                                                                                                                                                                                                                                                                                                                        | Active (KR 2008)                                                                                                       |
| 2006 | Device for the combined production of hydrogen and methane by fermentation of biological starting materials, comprises fermentation container, and units for discharge of liquid conversion products and for restraint of micro organisms | DE102006035213 B4;                                                                                                                                                                                                                                                                                                                     | Active (DE 2012)                                                                                                       |
| 2006 | A novel treatment method for wastewater with a high concentration of organics and its equipment                                                                                                                                           | TW200742737 A;                                                                                                                                                                                                                                                                                                                         | Rejected (TW 2010)                                                                                                     |
| 2006 | Process for enhancing anaerobic biohydrogen production                                                                                                                                                                                    | US7232669 B1; TW200734464 A;<br>TW1307364 B;                                                                                                                                                                                                                                                                                           | Active (US 2007; TW 2009)                                                                                              |
| 2006 | Process for over-production of hydrogen                                                                                                                                                                                                   | AU2007216223 B2; CA2642247 A1; A8;<br>EP1989287 A2; KR20080108990 A;<br>CN101384696 B; IN1127MUM2006 A;<br>JP2009544276 A; US2009325255 A1;<br>BRPI0706993 A2; IN272988 B;                                                                                                                                                             | Application (KR; BR)<br>Active (CN 2013; IN 2016)<br>Withdrawn (AU 2017; CA 2017; EP 2017; JP 2014; US 2017)           |
| 2005 | Method for obtaining hydrogen and methane from bioresidues, includes two phases, where in former phase aqueous suspension of bioresidues is introduced in reactor, and crushed to obtain particle size less than five millimeter          | ES2292312 B1;                                                                                                                                                                                                                                                                                                                          | Active (ES 2009)                                                                                                       |
| 2005 | Anaerobic phased solids digester for biogas production from organic solid wastes                                                                                                                                                          | WO2007075762 A3; US2007158264 A1;<br>US7556737 B2;                                                                                                                                                                                                                                                                                     | Application (WO)<br>Active (US 2009)                                                                                   |
| 2005 | Hydrogen fermentor and method of producing hydrogen                                                                                                                                                                                       | WO2007060791 A1; TW200724674 A;<br>IN5298DELNP2008 A; CN101312795 A;<br>US2009263876 A1; US7968322 B2;<br>BRPI0618883 A2; JP5374044 B2;                                                                                                                                                                                                | Application (WO; CN)<br>Active (US 2011; JP 2013)<br>Withdrawn (IN)<br>Rejected (TW 2012)                              |
| 2005 | Process for enhancing anaerobic biohydrogen production                                                                                                                                                                                    | TWI271380 B; TW200724483 A;                                                                                                                                                                                                                                                                                                            | Active (TW 2007)                                                                                                       |
| 2005 | Method for producing hydrogen from biomass                                                                                                                                                                                                | JP2007159534 A; JP5334077 B2;                                                                                                                                                                                                                                                                                                          | Withdrawn (JP 2016)                                                                                                    |
| 2005 | Hydrogen generating system                                                                                                                                                                                                                | JP2007159457 A;                                                                                                                                                                                                                                                                                                                        | Rejected (2011)                                                                                                        |

|      |                                                                                                                  |                                                                                                                                                                                                                                                                                                                                                                    |                                                                                                                                              |
|------|------------------------------------------------------------------------------------------------------------------|--------------------------------------------------------------------------------------------------------------------------------------------------------------------------------------------------------------------------------------------------------------------------------------------------------------------------------------------------------------------|----------------------------------------------------------------------------------------------------------------------------------------------|
| 2005 | Hydrogen fermentation method                                                                                     | JP2007098239 A;                                                                                                                                                                                                                                                                                                                                                    | Rejected (2011)                                                                                                                              |
| 2005 | Methods for manufacturing hydrogen using anaerobic digestion                                                     | US2006289355 A1; US7540961 B2;                                                                                                                                                                                                                                                                                                                                     | Active (US 2009)                                                                                                                             |
| 2005 | Anaerobic production of hydrogen and other chemical products                                                     | CA2605468 C; WO2006119052 A3; EP1877565 A4; US2008311640 A1; US8501463 B2;                                                                                                                                                                                                                                                                                         | Application (WO)<br>Active (CA 2016; US 2013)<br>Withdrawn (EP 2012)                                                                         |
| 2005 | Continuous anaerobic hydrogen-fermenting process for treating organic waste and method of producing hydrogen gas | KR100553231 B1;                                                                                                                                                                                                                                                                                                                                                    | Active (KR 2006)                                                                                                                             |
| 2005 | Producing Method of Hydrogen Gas Using Anaerobic Microorganism Complex                                           | KR20060110394 A; KR100719485 B1;                                                                                                                                                                                                                                                                                                                                   | Active (KR 2007)                                                                                                                             |
| 2005 | Method for Preparation of Anaerobic Microorganism Complex for Hydrogen Production                                | KR20060110393 A; KR100680625 B1;                                                                                                                                                                                                                                                                                                                                   | Active (KR 2007)                                                                                                                             |
| 2005 | Two-stage fermentation process and assembly to generate hydrogen and methane from biological residues            | DE102005012367 A1;                                                                                                                                                                                                                                                                                                                                                 | Rejected (DE 2009)                                                                                                                           |
| 2005 | Treatment method of organic waste accompanied by hydrogen production by microorganisms                           | JP2006223962 A;                                                                                                                                                                                                                                                                                                                                                    | Rejected (JP (2010)                                                                                                                          |
| 2004 | Process for microbial production of hydrogen and methane fuels                                                   | US7575907 B1;                                                                                                                                                                                                                                                                                                                                                      | Active (US 2009)                                                                                                                             |
| 2004 | Nutrient salt formula for hydrogen production of anaerobic organism                                              | TW200606127 A;                                                                                                                                                                                                                                                                                                                                                     | Rejected (TW 2008)                                                                                                                           |
| 2004 | Method for continuously producing hydrogen                                                                       | JP2006042691 A;                                                                                                                                                                                                                                                                                                                                                    | Rejected (JP 2010)                                                                                                                           |
| 2004 | Method for producing biological fuel                                                                             | CA2579192 A1; WO2006029971 A3; BE1016178 A3; EP1797164 B1;                                                                                                                                                                                                                                                                                                         | Application (WO)<br>Active (BE 2006; EP 2016)<br>Withdrawn (CA 2011)                                                                         |
| 2004 | Hydrogen production by anaerobic co-digestion of Organic waste                                                   | KR20050099847 A; KR100622994 B1;                                                                                                                                                                                                                                                                                                                                   | Active (KR 2006)                                                                                                                             |
| 2004 | Biogas Production Method Using Food Waste                                                                        | KR20050092272 A; KR100592491 B1;                                                                                                                                                                                                                                                                                                                                   | Active (KR 2006)                                                                                                                             |
| 2004 | Hydrogen fermentation method                                                                                     | JP2005211782 A;                                                                                                                                                                                                                                                                                                                                                    | Refused (JP 2009)                                                                                                                            |
| 2004 | Hydrogen production apparatus                                                                                    | JP2005200283 A;                                                                                                                                                                                                                                                                                                                                                    | -                                                                                                                                            |
| 2003 | Bio-electrochemical process for producing hydrogen                                                               | CA2531682 C; WO2005005981 A3; EP1656557 B1; CN1856706 B; US2007042480 A1; JP2007528709 A; US7439047 B2; AT491156 T; DE602004030454 D1; HK1092215 A1;                                                                                                                                                                                                               | Application (WO)<br>Active (CA 2013; EP 2010; CN 2010; US 2008; DE 2010)<br>Withdrawn (AT 2011)                                              |
| 2003 | Method and apparatus for anaerobically treating organic waste                                                    | JP2005125149 A; JP5121111 B2;                                                                                                                                                                                                                                                                                                                                      | Active (JP 2013)                                                                                                                             |
| 2003 | Hydrogen and methane two-stage fermentation treatment method for waste bread                                     | JP2005066420 A;                                                                                                                                                                                                                                                                                                                                                    | Rejected (JP 2008)                                                                                                                           |
| 2003 | Microbial production of hydrogen under anaerobic condition                                                       | TW200417533 A; TWI256946 B;                                                                                                                                                                                                                                                                                                                                        | Active (TW 2006)                                                                                                                             |
| 2002 | Improved biological production of hydrogen and co-production of methane                                          | TW200404046 A; SG111965 A1; TWI308904 B;                                                                                                                                                                                                                                                                                                                           | Active (TW 2009)                                                                                                                             |
| 2001 | Method for producing hydrogen by microbial group and the same hydrogen-fermenting microbial group                | JP2002272491 A; JP3885868 B2;                                                                                                                                                                                                                                                                                                                                      | Active (JP 2007)                                                                                                                             |
| 2000 | Process for production of hydrogen from anaerobically decomposed organic material                                | CA2399400 C; WO200156938 A1; AU2122100 A; KR20020082221 A; BR0017078 B1; EP1263686 B1; JP2003521258 A; CN1437564 A; RU2002123368 A; MXPA02007361 A; CN1243669 C; AT346826 T; DE60032179 T2; IN1359CHENP2002 A; RU2295502 C2; ES2275490 T3; IN210786 B; IL151008 B; KR100808736 B1; BRPI0017078 A2; JP4285933 B2; IN1997CHENP2009 A; IN2531CHENP2005 A; IN250915 B; | Application (WO)<br>Active (CA 2011; KR 2007; JP 2009; CN 2006; MX 2007; DE 2007; ES 2007; IN 2012)<br>Withdrawn (AU 2006; EP 2015; RU 2014) |
| 1999 | Production of hydrogen and/or methane of plant body                                                              | JP2000232891 A; JP3739584 B2;                                                                                                                                                                                                                                                                                                                                      | Withdrawn (JP 2015)                                                                                                                          |

The patent status column was assessed in March 2018. Years indicated near country abbreviations in this column correspond to the date of the last status update.

**Table S3: Scientific article database**

| Date | Title                                                                                                                                                                                              | DOI                              |
|------|----------------------------------------------------------------------------------------------------------------------------------------------------------------------------------------------------|----------------------------------|
| 2017 | Effects of pH and substrate concentrations on dark fermentative biohydrogen production from xylose by extreme thermophilic mixed culture                                                           | 10.1007/s11274-016-2178-1        |
| 2017 | Factors affecting on hythane bio-generation via anaerobic digestion of mono-ethylene glycol contaminated wastewater: Inoculum-to-substrate ratio, nitrogen-to-phosphorus ratio and pH              | 10.1016/j.biortech.2016.10.026   |
| 2017 | Hydrogen production from starch by co-culture of <i>Clostridium acetobutylicum</i> and <i>Rhodobacter sphaeroides</i> in one step hybrid dark- and photofermentation in repeated fed-batch reactor | 10.1016/j.biortech.2016.10.060   |
| 2017 | Long-term operation of microbial electrosynthesis cell reducing CO <sub>2</sub> to multi-carbon chemicals with a mixed culture avoiding methanogenesis                                             | 10.1016/j.bioelechem.2016.09.001 |
| 2016 | High-purity propionate production from glycerol in mixed culture fermentation                                                                                                                      | 10.1016/j.biortech.2016.08.026   |
| 2016 | Regulation of acidogenic metabolism towards enhanced short chain fatty acid biosynthesis from waste: Metagenomic profiling                                                                         | 10.1039/c5ra24254a               |
| 2016 | Cell wash-out enrichment increases the stability and performance of biohydrogen producing packed-bed reactors and the community transition along the operation time                                | 10.1016/j.renene.2016.05.082     |
| 2016 | The type of carbohydrates specifically selects microbial community structures and fermentation patterns                                                                                            | 10.1016/j.biortech.2016.09.084   |
| 2016 | Dark fermentative hydrogen and ethanol production from biodiesel waste glycerol using a co-culture of <i>Escherichia coli</i> and <i>Enterobacter</i> sp.                                          | 10.1016/j.fuel.2016.08.043       |
| 2016 | Mesophilic and Thermophilic Biohydrogen Production from Xylose at Various Initial pH and Substrate Concentrations with Microflora Community Analysis                                               | 10.1021/acs.energyfuels.5b02143  |
| 2016 | High rate hydrogen fermentation of cello-lignin fraction in de-oiled jatropha waste using hybrid immobilized cell system                                                                           | 10.1016/j.fuel.2016.05.088       |
| 2016 | Short-chain fatty acids production and microbial community in sludge alkaline fermentation: Long-term effect of temperature                                                                        | 10.1016/j.biortech.2016.03.138   |
| 2016 | Performance and microbial community analysis in alkaline two-stage enhanced anaerobic sludge digestion system                                                                                      | 10.1016/j.bej.2015.10.004        |
| 2016 | Microbial responses to various process disturbances in a continuous hydrogen reactor fed with galactose                                                                                            | 10.1016/j.jbiosc.2016.08.006     |
| 2016 | Evaluation of different pretreatments on organic matter solubilization and hydrogen fermentation of mixed microalgae consortia                                                                     | 10.1016/j.ijhydene.2016.05.195   |
| 2016 | Changes in microbial community during hydrogen and methane production in two-stage thermophilic anaerobic co-digestion process from biowaste                                                       | 10.1016/j.wasman.2016.01.016     |
| 2016 | Pretreatment conditions of rice straw for simultaneous hydrogen and ethanol fermentation by mixed culture                                                                                          | 10.1016/j.ijhydene.2015.10.147   |
| 2016 | Process enhancement of hydrogen and methane production from palm oil mill effluent using two-stage thermophilic and mesophilic fermentation                                                        | 10.1016/j.ijhydene.2016.05.037   |
| 2016 | Co-generation of biohydrogen and biomethane through two-stage batch co-fermentation of macro- and micro-algal biomass                                                                              | 10.1016/j.biortech.2016.06.092   |
| 2016 | Optimum alcohol concentration for chain elongation in mixed-culture fermentation of cellulosic substrate                                                                                           | 10.1002/bit.26024                |
| 2016 | Two-stage thermophilic fermentation and mesophilic methanogenic process for biohythane production from palm oil mill effluent with methanogenic effluent recirculation for pH control              | 10.1016/j.ijhydene.2016.07.095   |
| 2016 | Potential and optimization of two-phase anaerobic digestion of oil refinery waste activated sludge and microbial community study                                                                   | 10.1038/srep38245                |
| 2016 | Fermentative biohydrogen and biomethane co-production from mixture of food waste and sewage sludge: Effects of physiochemical properties and mix ratios on fermentation performance                | 10.1016/j.apenergy.2016.10.003   |
| 2016 | Boosting dark fermentation with co-cultures of extreme thermophiles for biohythane production from garden waste                                                                                    | 10.1016/j.biortech.2016.07.096   |
| 2016 | High-rate hydrogen production from galactose in an upflow anaerobic sludge blanket reactor (UASBr)                                                                                                 | 10.1039/c6ra09298e               |
| 2016 | Critical analysis of hydrogen production from mixed culture fermentation under thermophilic condition (60°C)                                                                                       | 10.1007/s00253-016-7482-z        |
| 2016 | Production of Bio-Based Hydrogen Enriched Methane from Waste Glycerol in a Two Stage Continuous System                                                                                             | 10.1007/s12649-016-9538-9        |
| 2016 | Consistent 1,3-propanediol production from glycerol in mixed culture fermentation over a wide range of pH                                                                                          | 10.1186/s13068-016-0447-8        |
| 2016 | Single-stage and two-stage anaerobic digestion of extruded lignocellulosic biomass                                                                                                                 | 10.1016/j.apenergy.2016.10.039   |
| 2016 | Comparison of various carbohydrates for hydrogen production in microbial electrolysis cells                                                                                                        | 10.1080/13102818.2015.1081078    |
| 2016 | Increased performance of hydrogen production in microbial electrolysis cells under alkaline conditions                                                                                             | 10.1016/j.bioelechem.2016.01.003 |
| 2016 | Fermentative hydrogen production in an up-flow anaerobic biofilm reactor inoculated with a co-culture of <i>Clostridium acetobutylicum</i> and <i>Desulfovibrio vulgaris</i>                       | 10.1016/j.biortech.2016.09.072   |
| 2016 | Biochemical hydrogen and methane potential of sugarcane syrup using a two-stage anaerobic fermentation process                                                                                     | 10.1016/j.indcrop.2015.12.002    |
| 2016 | Microbial dynamics of the extreme-thermophilic (70 °C) mixed culture for hydrogen production in a chemostat                                                                                        | 10.1016/j.ijhydene.2016.04.085   |
| 2016 | Towards biohythane production from biomass: Influence of operational stage on anaerobic fermentation and microbial community                                                                       | 10.1016/j.ijhydene.2015.06.045   |

|      |                                                                                                                                                                                                         |                                 |
|------|---------------------------------------------------------------------------------------------------------------------------------------------------------------------------------------------------------|---------------------------------|
| 2016 | Fermentative production of hydrogen in presence of modified mesoporous silica SBA-15                                                                                                                    | 10.1016/j.ijhydene.2016.05.112  |
| 2016 | Combining the enrichment and accumulation step in non-axenic PHA production: Cultivation of <i>Plasticicumulans acidivorans</i> at high volume exchange ratios                                          | 10.1016/j.jbiotec.2016.06.016   |
| 2016 | Effect of volatile fatty acids mixtures on the simultaneous photofermentative production of hydrogen and polyhydroxybutyrate                                                                            | 10.1007/s00449-016-1691-9       |
| 2016 | Transcriptomic responses of the interactions between <i>Clostridium Cellulovorans</i> 743b and <i>Rhodopseudomonas Palustris</i> CGA009 in a cellulose-grown coculture for enhanced hydrogen production | 10.1128/AEM.00789-16            |
| 2016 | Product Diversity Linked to Substrate Usage in Chain Elongation by Mixed-Culture Fermentation                                                                                                           | 10.1021/acs.est.5b06021         |
| 2016 | Single and two-stage anaerobic digestion for hydrogen and methane production from acid and enzymatic hydrolysates of Agave tequilana bagasse                                                            | 10.1016/j.ijhydene.2015.11.016  |
| 2016 | Enrichment of secondary wastewater sludge for production of hydrogen from crude glycerol and comparative evaluation of mono-, co- and mixed-culture systems                                             | 10.3390/ijms17010092            |
| 2016 | Photo-fermentative hydrogen production from enzymatic hydrolysate of corn stalk pith with a photosynthetic consortium                                                                                   | 10.1016/j.ijhydene.2016.07.129  |
| 2016 | Microbial dynamics in ethanol fermentation from glycerol                                                                                                                                                | 10.1016/j.ijhydene.2016.04.188  |
| 2016 | Thermal characterization of anaerobic sludges from wastewater treatments applied to biological generation of H <sub>2</sub>                                                                             | 10.1007/s10973-016-5932-6       |
| 2016 | Optimization of biohydrogen yield produced by bacterial consortia using residual glycerin from biodiesel production                                                                                     | 10.1016/j.biortech.2016.07.141  |
| 2016 | Hydrogen gas production from waste peach pulp by dark fermentation and electrohydrolysis                                                                                                                | 10.1016/j.ijhydene.2015.11.170  |
| 2016 | Characterization of hydrogen production by the co-culture of dark-fermentative and photosynthetic bacteria                                                                                              | 10.1007/s11164-016-2656-y       |
| 2016 | Mesophilic biogenic H <sub>2</sub> production using galactose in a fixed bed reactor                                                                                                                    | 10.1016/j.ijhydene.2016.07.203  |
| 2016 | Concomitant biohydrogen and poly-beta-hydroxybutyrate production from dark fermentation effluents by adapted <i>Rhodobacter sphaeroides</i> and mixed photofermentative cultures                        | 10.1016/j.biortech.2016.03.017  |
| 2016 | Methanol as an alternative electron donor in chain elongation for butyrate and caproate formation                                                                                                       | 10.1016/j.biombioe.2016.07.008  |
| 2016 | Optimization of Hydrogen Production by Response Surface Methodology Using gamma-Irradiated Sludge as Inoculum                                                                                           | 10.1021/acs.energyfuels.6b00262 |
| 2016 | Biohydrogen production from simple carbohydrates with optimization of operating parameters                                                                                                              | 10.17344/acs.2015.2085          |
| 2016 | High robustness of a simplified microbial consortium producing hydrogen in long term operation of a biofilm fermentative reactor                                                                        | 10.1016/j.ijhydene.2015.11.131  |
| 2016 | Bio-hydrogen production from waste peach pulp by dark fermentation: Effect of inoculum addition                                                                                                         | 10.1016/j.ijhydene.2016.06.225  |
| 2016 | Simultaneous Hydrogen and Methane Production Through Multi-Phase Anaerobic Digestion of Paperboard Mill Wastewater Under Different Operating Conditions                                                 | 10.1007/s12010-016-2204-7       |
| 2016 | Microbial removal of carboxylic acids from 1,3-propanediol in glycerol anaerobic digestion effluent by PHAs-producing consortium                                                                        | 10.1016/j.bej.2016.04.031       |
| 2016 | Feasibility of enriched mixed cultures obtained by repeated batch transfer in continuous hydrogen fermentation                                                                                          | 10.1016/j.ijhydene.2015.06.133  |
| 2016 | Design, implementation and assessment of a novel bioreactor for fermentative biohydrogen process development                                                                                            | 10.1016/j.ijhydene.2016.04.208  |
| 2016 | Feasibility study of SCFAs production from microalgae during hydrogen fermentation                                                                                                                      | 10.1016/j.ijhydene.2015.10.135  |
| 2016 | Biohydrogen Production from Liquid and Solid Fractions of Sugarcane Bagasse After Optimized Pretreatment with Hydrochloric Acid                                                                         | 10.1007/s12649-016-9494-4       |
| 2016 | Comparison of micro-aerobic and anaerobic fermentative hydrogen production from corn straw                                                                                                              | 10.1016/j.ijhydene.2016.01.141  |
| 2016 | Hydrolysis-acidogenesis of food waste in solid-liquid-separating continuous stirred tank reactor (SLS-CSTR) for volatile organic acid production                                                        | 10.1016/j.biortech.2015.10.017  |
| 2016 | Fermentative bio-hydrogen production from galactose                                                                                                                                                     | 10.1016/j.energy.2015.12.087    |
| 2016 | Failure of biohydrogen production by low levels of substrate and lactic acid accumulation                                                                                                               | 10.1016/j.renene.2015.09.016    |
| 2016 | Impact of pH control and heat pre-treatment of seed inoculum in dark H <sub>2</sub> fermentation: A feasibility report using mixed microalgae biomass as feedstock                                      | 10.1016/j.ijhydene.2015.08.069  |
| 2016 | Anaerobic fermentation combined with low-temperature thermal pretreatment for phosphorus-accumulating granular sludge: Release of carbon source and phosphorus as well as hydrogen production potential | 10.1016/j.biortech.2016.06.060  |
| 2016 | Enhanced biohydrogen production from corn stover by the combination of <i>Clostridium cellulolyticum</i> and hydrogen fermentation bacteria                                                             | 10.1016/j.jbiosc.2016.03.014    |
| 2016 | A new biological process for short-chain fatty acid generation from waste activated sludge improved by <i>Clostridiales</i> enhancement                                                                 | 10.1007/s11356-016-7579-z       |
| 2016 | Evaluation of hydrogen and methane production from sugarcane bagasse hemicellulose hydrolysates by two-stage anaerobic digestion process                                                                | 10.1016/j.biortech.2016.06.113  |
| 2016 | Effect of biochar addition on hydrogen and methane production in two-phase anaerobic digestion of aqueous carbohydrates food waste                                                                      | 10.1016/j.biortech.2016.07.089  |
| 2016 | Biohydrogen and methane production via a two-step process using an acid pretreated native microalgae consortium                                                                                         | 10.1016/j.biortech.2016.09.050  |



|      |                                                                                                                                                                                          |                                |
|------|------------------------------------------------------------------------------------------------------------------------------------------------------------------------------------------|--------------------------------|
| 2016 | Microbial network for waste activated sludge cascade utilization in an integrated system of microbial electrolysis and anaerobic fermentation                                            | 10.1186/s13068-016-0493-2      |
| 2016 | Microbial electrolysis cell to treat hydrothermal liquefied wastewater from cornstalk and recover hydrogen: Degradation of organic compounds and characterization of microbial community | 10.1016/j.ijhydene.2016.01.032 |
| 2016 | Multiple syntrophic interactions drive biohythane production from waste sludge in microbial electrolysis cells                                                                           | 10.1186/s13068-016-0579-x      |
| 2016 | Photosynthetic hydrogen production from enzyme-hydrolyzed micro-grinded maize straws                                                                                                     | 10.1016/j.ijhydene.2016.07.029 |
| 2015 | Optimization of substrate composition for biohydrogen production from buffalo slurry co-fermented with cheese whey and crude glycerol, using microbial mixed culture                     | 10.1016/j.ijhydene.2014.11.008 |
| 2015 | Sequential fermentative and phototrophic system for hydrogen production: An approach for Brazilian alcohol distillery wastewater                                                         | 10.1016/j.ijhydene.2015.06.003 |
| 2015 | Improved Hydrogen Production from Galactose Via Immobilized Mixed Consortia                                                                                                              | 10.1007/s13369-015-1729-3      |
| 2015 | Single-stage operation of hybrid dark-photo fermentation to enhance biohydrogen production through regulation of system redox condition: Evaluation with real-field wastewater           | 10.3390/ijms16059540           |
| 2015 | Effect of pH and retention time on volatile fatty acids production during mixed culture fermentation                                                                                     | 10.1016/j.biortech.2015.04.096 |
| 2015 | Effect of reaction mode on biohydrogen production and its microbial diversity                                                                                                            | 10.1016/j.ijhydene.2015.01.030 |
| 2015 | Acidogenic fermentation of food waste for volatile fatty acid production with co-generation of biohydrogen                                                                               | 10.1016/j.biortech.2015.01.007 |
| 2015 | Adaptation of acidogenic sludge to increasing glycerol concentrations for biohydrogen production                                                                                         | 10.1007/s00253-015-6832-6      |
| 2015 | Enhanced dark fermentative hydrogen production by zero-valent iron activated carbon micro-electrolysis                                                                                   | 10.1016/j.ijhydene.2015.07.106 |
| 2015 | Fermentative hydrogen production from corn stover hydrolyzate by two typical seed sludges: Effect of temperature                                                                         | 10.1016/j.ijhydene.2015.01.120 |
| 2015 | Surfactant-enhanced biohydrogen production from organic fraction of municipal solid waste (OFMSW) via dry anaerobic digestion                                                            | 10.1016/j.apenergy.2015.03.127 |
| 2015 | Temperature and solids retention time control microbial population dynamics and volatile fatty acid production in replicated anaerobic digesters                                         | 10.1038/srep08496              |
| 2015 | High-rate fermentative hydrogen production from beverage wastewater                                                                                                                      | 10.1016/j.apenergy.2015.01.136 |
| 2015 | Surfactant-supplemented mixed bacterial cultures to produce hydrogen from paperboard mill wastewater                                                                                     | 10.1002/elsc.201400099         |
| 2015 | Dry anaerobic co-digestion of organic fraction of municipal waste with paperboard mill sludge and gelatin solid waste for enhancement of hydrogen production                             | 10.1016/j.biortech.2015.05.017 |
| 2015 | The glucose metabolic distribution in thermophilic (55 °C) mixed culture fermentation: A chemostat study                                                                                 | 10.1016/j.ijhydene.2014.11.098 |
| 2015 | Simultaneous production of acetate and methane from glycerol by selective enrichment of hydrogenotrophic methanogens in extreme-thermophilic (70°C) mixed culture fermentation           | 10.1016/j.apenergy.2015.03.104 |
| 2015 | Effects of anti-foaming agents on biohydrogen production                                                                                                                                 | 10.1016/j.biortech.2016.02.121 |
| 2015 | Production of medium-chain volatile fatty acids by mixed ruminal microorganisms is enhanced by ethanol in co-culture with <i>Clostridium kluyveri</i>                                    | 10.1016/j.biortech.2014.10.054 |
| 2015 | Optimization of hydrogen production from organic fraction of municipal solid waste (OFMSW) dry anaerobic digestion with analysis of microbial community                                  | 10.1002/er.3297                |
| 2015 | Substrate consumption and hydrogen production via co-fermentation of monomers derived from carbohydrates and proteins in biomass wastes                                                  | 10.1016/j.apenergy.2014.11.016 |
| 2015 | Effects of furan derivatives on biohydrogen fermentation from wet steam-exploded cornstalk and its microbial community                                                                   | 10.1016/j.biortech.2014.10.067 |
| 2015 | Two-stage thermophilic fermentation and mesophilic methanogen process for biohythane production from palm oil mill effluent                                                              | 10.1016/j.ijhydene.2015.03.068 |
| 2015 | Improvement of bioelectrochemical property and energy recovery by acylhomoserine lactones (AHLs) in microbial electrolysis cells (MECs)                                                  | 10.1016/j.jpowsour.2015.03.007 |
| 2015 | Comparison of Different Strategies for Selection/Adaptation of Mixed Microbial Cultures Able to Ferment Crude Glycerol Derived from Second-Generation Biodiesel                          | 10.1155/2015/932934            |
| 2015 | Multistep anaerobic digestion (MAD) as a tool to increase energy production via H <sub>2</sub> +CH <sub>4</sub>                                                                          | 10.1016/j.ijhydene.2015.02.068 |
| 2015 | Raw dark fermentation effluent to support heterotrophic microalgae growth: Microalgae successfully outcompete bacteria for acetate                                                       | 10.1016/j.algal.2015.08.011    |
| 2015 | Electrochemical startup increases 1,3-propanediol titers in mixed-culture glycerol fermentations                                                                                         | 10.1016/j.procbio.2015.06.020  |
| 2015 | Development of bioelectrocatalytic activity stimulates mixed-culture reduction of glycerol in a bioelectrochemical system                                                                | 10.1111/1751-7915.12240        |
| 2015 | The role of pH control on biohydrogen production by single stage hybrid dark- and photo-fermentation                                                                                     | 10.1016/j.biortech.2015.07.028 |
| 2015 | CO <sub>2</sub> -free biohydrogen production by mixed dark and photofermentation bacteria from sorghum starch using a modified simple purification and collection system                 | 10.1016/j.energy.2015.05.044   |
| 2015 | Fermentative hydrogen production using wheat flour hydrolysate by mixed culture                                                                                                          | 10.1016/j.ijhydene.2015.02.016 |
| 2015 | Isolation and characterisation of non-anaerobic butanol-producing symbiotic system TSH06                                                                                                 | 10.1007/s00253-015-6864-y      |

|      |                                                                                                                                                                             |                                  |
|------|-----------------------------------------------------------------------------------------------------------------------------------------------------------------------------|----------------------------------|
| 2015 | Physicochemical characteristics of attached biofilm on granular activated carbon for thermophilic biohydrogen production                                                    | 10.1039/c4ra12730g               |
| 2015 | Batch, design optimization, and DNA sequencing study for continuous 1,3-propanediol production from waste glycerol by a soil-based inoculum                                 | 10.1007/s00253-014-6259-5        |
| 2015 | Bacterial synthesis of polyhydroxyalkanoates using dark fermentation effluents: Comparison between pure and enriched mixed cultures                                         | 10.1002/elsc.201500016           |
| 2015 | Pretreatment of vinegar residue and anaerobic sludge for enhanced hydrogen and methane production in the two-stage anaerobic system                                         | 10.1016/j.ijhydene.2015.02.029   |
| 2015 | Research on soybean protein wastewater treatment by the integrated two-phase anaerobic reactor                                                                              | 10.1016/j.sjbs.2015.01.006       |
| 2015 | Improved cellulose conversion to bio-hydrogen with thermophilic bacteria and characterization of microbial community in continuous bioreactor                               | 10.1016/j.biombioe.2015.02.010   |
| 2015 | Bioaugmentation of <i>Lactobacillus delbrueckii</i> ssp. <i>bulgaricus</i> TISTR 895 to enhance bio-hydrogen production of <i>Rhodobacter sphaeroides</i> KKU-PS5           | 10.1186/s13068-015-0375-z        |
| 2015 | Thermophilic fermentative biohydrogen production from xylan by anaerobic mixed cultures in elephant dung                                                                    | 10.1080/15435075.2014.887567     |
| 2015 | Hydrogen photoproduction by co-culture <i>Clostridium butyricum</i> and <i>Rhodobacter sphaeroides</i>                                                                      | 10.1016/j.ijhydene.2015.08.086   |
| 2015 | Hydrogen and lipid production from starch wastewater by co-culture of anaerobic sludge and oleaginous microalgae with simultaneous COD, nitrogen and phosphorus removal     | 10.1016/j.watres.2015.08.057     |
| 2015 | Optimization of volatile fatty acids concentration for photofermentative hydrogen production by a consortium                                                                | 10.1016/j.ijhydene.2015.10.020   |
| 2015 | Effects of nitrate concentration on biohydrogen production and substrate utilization in dark-fermentation                                                                   | 10.1007/s10163-013-0219-5        |
| 2015 | Effect of inoculum concentration, pH, light intensity and lighting regime on hydrogen production by phototrophic microbial consortium                                       | 10.1016/j.renene.2014.09.034     |
| 2015 | Changes in performance and bacterial communities in response to various process disturbances in a high-rate biohydrogen reactor fed with galactose                          | 10.1016/j.biortech.2015.01.107   |
| 2015 | Optimal conditions for biological hydrogen production from food waste                                                                                                       | 10.4491/eer.2013.104             |
| 2015 | Continuous biohydrogen production from starch wastewater via sequential dark-photo fermentation with emphasize on maghemite nanoparticles                                   | 10.1016/j.jiec.2014.03.011       |
| 2015 | Inoculum pretreatment promotes differences in hydrogen production performance in EGSB reactors                                                                              | 10.1016/j.ijhydene.2015.03.048   |
| 2015 | Sequential fermentative and phototrophic system for hydrogen production: An approach for Brazilian alcohol distillery wastewater                                            | 10.1016/j.ijhydene.2015.06.003   |
| 2015 | Identification of <i>Candida tropicalis</i> BH-6 and Synergistic Effect with <i>Pantoea agglomerans</i> BH-18 on Hydrogen Production in Marine Culture                      | 10.1007/s12010-014-1436-7        |
| 2015 | Thermophilic anaerobic co-digestion of organic fraction of municipal solid waste (OFMSW) with food waste (FW): Enhancement of bio-hydrogen production                       | 10.1016/j.biortech.2015.07.011   |
| 2015 | Feasibility of biohydrogen production from industrial wastes using defined microbial co-culture                                                                             | 10.1186/s40659-015-0015-x        |
| 2015 | Biohydrogen production by co-fermentation of crude glycerol and apple pomace hydrolysate using co-culture of <i>Enterobacter aerogenes</i> and <i>Clostridium butyricum</i> | 10.1016/j.biortech.2015.06.095   |
| 2015 | Suppression of methanogenesis in hydrogen fermentation by intermittent feeding                                                                                              | 10.1080/10934529.2015.1074480    |
| 2015 | Efficient Anaerobic Co-Digestion of Municipal Food Waste and Kitchen Wastewater for Bio-Hydrogen Production                                                                 | 10.1080/15435075.2014.909357     |
| 2015 | Third generation biohydrogen production by <i>Clostridium butyricum</i> and adapted mixed cultures from <i>Scenedesmus obliquus</i> microalga biomass                       | 10.1016/j.fuel.2015.02.093       |
| 2015 | Integrated treatment of municipal sewage sludge by deep dewatering and anaerobic fermentation for biohydrogen production                                                    | 10.1007/s11356-014-3514-3        |
| 2015 | Impact of pH management interval on biohydrogen production from organic fraction of municipal solid wastes by mesophilic thermophilic anaerobic codigestion                 | 10.1155/2015/590753              |
| 2015 | Integrative approach to produce hydrogen and polyhydroxybutyrate from biowaste using defined bacterial cultures                                                             | 10.1016/j.biortech.2014.11.029   |
| 2015 | Comparative evaluation of the hydrogen production by mixed consortium, synthetic co-culture and pure culture using distillery effluent                                      | 10.1016/j.biortech.2015.09.074   |
| 2015 | Effect of methanogenic effluent recycling on continuous H <sub>2</sub> production from food waste                                                                           | 10.1002/ep.11980                 |
| 2015 | Novel approach of ethanol waste utilization: Biohydrogen production by mixed cultures of dark- and photo-fermentative bacteria using distillers grains                      | 10.1016/j.ijhydene.2015.11.082   |
| 2015 | Generation of bioethanol and VFA through anaerobic acidogenic fermentation route with press mud obtained from sugar mill as a feedstock                                     | 10.1016/j.biortech.2015.05.104   |
| 2015 | A comprehensive study on volatile fatty acids production from rice straw coupled with microbial community analysis                                                          | 10.1007/s00449-015-1357-z        |
| 2015 | Lactic acid and methane: Improved exploitation of biowaste potential                                                                                                        | 10.1016/j.biortech.2014.10.136   |
| 2015 | Microbial community analysis in a long-term membrane-less microbial electrolysis cell with hydrogen and methane production                                                  | 10.1016/j.bioelechem.2015.06.003 |
| 2015 | Can bicarbonate replace phosphate to improve the sustainability of bioelectrochemical systems for H <sub>2</sub> production?                                                | 10.1039/c5ra00702j               |
| 2015 | Selective Enrichment Establishes a Stable Performing Community for Microbial Electrosynthesis of Acetate from CO <sub>2</sub>                                               | 10.1021/es506149d                |

|      |                                                                                                                                                                                                                                                |                                |
|------|------------------------------------------------------------------------------------------------------------------------------------------------------------------------------------------------------------------------------------------------|--------------------------------|
| 2015 | Bio-electrocatalytic reduction of CO <sub>2</sub> : Enrichment of homoacetogens and pH optimization towards enhancement of carboxylic acids biosynthesis                                                                                       | 10.1016/j.jcou.2015.04.001     |
| 2015 | Carbon dioxide reduction by mixed and pure cultures in microbial electrosynthesis using an assembly of graphite felt and stainless steel as a cathode                                                                                          | 10.1016/j.biortech.2015.05.081 |
| 2015 | Alamethicin suppresses methanogenesis and promotes acetogenesis in bioelectrochemical systems                                                                                                                                                  | 10.1128/AEM.00594-15           |
| 2015 | Hydrogen production in single chamber microbial electrolysis cells with different complex substrates                                                                                                                                           | 10.1016/j.watres.2014.10.026   |
| 2015 | Evaluation of different support materials used with a photo-fermentative consortium for hydrogen production                                                                                                                                    | 10.1016/j.ijhydene.2015.08.057 |
| 2015 | Exploitation of algal-bacterial associations in a two-stage biohydrogen and biogas generation process                                                                                                                                          | 10.1186/s13068-015-0243-x      |
| 2015 | Preparation of volatile fatty acid (VFA) calcium salts by anaerobic digestion of glucose                                                                                                                                                       | 10.1002/bab.1301               |
| 2014 | Hydrogen production from diluted and raw sugarcane vinasse under thermophilic anaerobic conditions                                                                                                                                             | 10.1016/j.ijhydene.2014.04.104 |
| 2014 | Co-fermentation of glucose, starch, and cellulose for mesophilic biohydrogen production                                                                                                                                                        | 10.1016/j.ijhydene.2014.10.079 |
| 2014 | Organic loading rate impact on biohydrogen production and microbial communities at anaerobic fluidized thermophilic bed reactors treating sugarcane stillage                                                                                   | 10.1016/j.biortech.2014.02.051 |
| 2014 | Biohydrogen production through dark fermentation by a microbial consortium using whey permeate as substrate                                                                                                                                    | 10.1007/s12010-014-0778-5      |
| 2014 | Effect of pH on the anaerobic acidogenesis of agroindustrial wastewaters for maximization of bio-hydrogen production: A lab-scale evaluation using batch tests                                                                                 | 10.1016/j.biortech.2014.03.149 |
| 2014 | Continuous thermophilic hydrogen production and microbial community analysis from anaerobic digestion of diluted sugar cane stillage                                                                                                           | 10.1016/j.ijhydene.2014.03.241 |
| 2014 | Overcoming propionic acid inhibition of hydrogen fermentation by temperature shift strategy                                                                                                                                                    | 10.1016/j.ijhydene.2014.03.260 |
| 2014 | Inoculum preparation of anaerobic mixed cultures by electric field for dark fermentative hydrogen production                                                                                                                                   | 10.1002/er.3208                |
| 2014 | Simultaneous biohydrogen production and wastewater treatment based on the selective enrichment of the fermentation ecosystem                                                                                                                   | 10.1016/j.ijhydene.2013.08.139 |
| 2014 | Strategies to cope with methanogens in hydrogen producing UASB reactors: Community dynamics                                                                                                                                                    | 10.1016/j.ijhydene.2014.05.099 |
| 2014 | Optimizing hydrogen production from a switchgrass steam exploded liquor using a mixed anaerobic culture in an upflow anaerobic sludge blanket reactor                                                                                          | 10.1016/j.ijhydene.2013.12.057 |
| 2014 | Effect of pH and buffer on butyric acid production and microbial community characteristics in bioconversion of rice straw with undefined mixed culture                                                                                         | 10.1007/s12257-013-0655-z      |
| 2014 | Use of coffee mucilage as a new substrate for hydrogen production in anaerobic co-digestion with swine manure                                                                                                                                  | 10.1016/j.biortech.2014.02.101 |
| 2014 | The influence of iron concentration on biohydrogen production from organic waste via anaerobic fermentation                                                                                                                                    | 10.1080/09593330.2014.927929   |
| 2014 | Anaerobic digestion of skim latex serum (SLS) for hydrogen and methane production using a two-stage process in a series of up-flow anaerobic sludge blanket (UASB) reactor                                                                     | 10.1016/j.ijhydene.2014.06.057 |
| 2014 | Batch fermentative hydrogen production utilising sago ( <i>Metroxylon</i> sp.) starch processing effluent by enriched sago sludge consortia                                                                                                    | 10.1016/j.ijhydene.2014.10.015 |
| 2014 | Butyric acid fermentation of sodium hydroxide pretreated rice straw with undefined mixed culture                                                                                                                                               | 10.4014/jmb.1309.09078         |
| 2014 | Biohydrogen production from textile wastewater by mixed microflora in an intermittent-flow, stirred tank reactor: Effect of feeding frequency                                                                                                  | 10.1002/jccs.201300524         |
| 2014 | Influence of headspace composition on product diversity by sulphate reducing bacteria biocathode                                                                                                                                               | 10.1016/j.biortech.2014.03.075 |
| 2014 | Hydrogen production from cassava pulp hydrolysate by mixed seed cultures: Effects of initial pH, substrate and biomass concentrations                                                                                                          | 10.1016/j.biombioe.2014.03.057 |
| 2014 | Thermophilic two-phase anaerobic digestion of source-sorted organic fraction of municipal solid waste for bio-hythane production: Effect of recirculation sludge on process stability and microbiology over a long-term pilot-scale experience | 10.2166/wst.2014.137           |
| 2014 | Batch anaerobic co-digestion of cow manure and waste milk in two-stage process for hydrogen and methane productions                                                                                                                            | 10.1007/s00449-013-1000-9      |
| 2014 | Using a statistical approach to model hydrogen production from a steam exploded corn stalk hydrolysate fed to mixed anaerobic cultures in an ASBR                                                                                              | 10.1016/j.ijhydene.2014.04.115 |
| 2014 | Upgrading dilute ethanol from syngas fermentation to n-caproate with reactor microbiomes                                                                                                                                                       | 10.1016/j.biortech.2013.09.105 |
| 2014 | Repression of hydrogen uptake using conjugated oligoelectrolytes in microbial electrolysis cells                                                                                                                                               | 10.1016/j.ijhydene.2014.09.101 |
| 2014 | Efficient production of 1,3-propanediol from fermentation of crude glycerol with mixed cultures in a simple medium                                                                                                                             | 10.1007/s00449-013-0989-0      |
| 2014 | Dynamics of hydrogen-producing bacteria in a repeated batch fermentation process using lake sediment as inoculum                                                                                                                               | 10.1007/s00203-013-0947-x      |
| 2014 | Economic process to produce biohydrogen and volatile fatty acids by a mixed culture using vinasse from sugarcane ethanol industry as nutrient source                                                                                           | 10.1016/j.biortech.2014.02.042 |
| 2014 | Anaerobic mesophilic co-digestion of sewage sludge with glycerol: Enhanced biohydrogen production                                                                                                                                              | 10.1016/j.ijhydene.2013.12.006 |
| 2014 | Enhanced dark fermentative hydrogen production under the effect of zero-valent iron shavings                                                                                                                                                   | 10.1016/j.ijhydene.2014.06.055 |

|      |                                                                                                                                                                                                        |                                                       |
|------|--------------------------------------------------------------------------------------------------------------------------------------------------------------------------------------------------------|-------------------------------------------------------|
| 2014 | The Influence of the Buffering Capacity on the Production of Organic Acids and Alcohols from Wastewater in Anaerobic Reactor                                                                           | 10.1007/s12010-014-1424-y                             |
| 2014 | Effect of operational pH on biohydrogen production from food waste using anaerobic batch reactors                                                                                                      | 10.2166/wst.2014.097                                  |
| 2014 | Bioaugmentation of potent acidogenic isolates: A strategy for enhancing biohydrogen production at elevated organic load                                                                                | 10.1016/j.biortech.2014.03.049                        |
| 2014 | Alkaline pretreatment to enhance one-stage CH <sub>4</sub> and two-stage H <sub>2</sub> /CH <sub>4</sub> production from sunflower stalks: Mass, energy and economical balances                        | 10.1016/j.cej.2014.08.108                             |
| 2014 | Photo-fermentative hydrogen production from mixed substrate by mixed bacteria                                                                                                                          | 10.1016/j.ijhydene.2014.04.097                        |
| 2014 | Effect of organic loading rate on continuous hydrogen production from food waste in submerged anaerobic membrane bioreactor                                                                            | 10.1016/j.ijhydene.2014.08.022                        |
| 2014 | Use of mixed culture bacteria for photofermentive hydrogen of dark fermentation effluent                                                                                                               | 10.1016/j.biortech.2014.03.065                        |
| 2014 | Polyhydroxyalkanoate (PHA) production from sludge and municipal wastewater treatment                                                                                                                   | 10.2166/wst.2013.643                                  |
| 2014 | Thermophilic biohydrogen production using pre-treated algal biomass as substrate                                                                                                                       | 10.1016/j.biombioe.2013.12.006                        |
| 2014 | Development of a highly specific and productive process for n-caproic acid production: Applying lessons from methanogenic microbiomes                                                                  | 10.2166/wst.2013.549                                  |
| 2014 | The impact of pH control on the volumetric productivity of mixed culture PHA production from fermented molasses                                                                                        | 10.1002/elsc.201200220                                |
| 2014 | Methanol opportunities for electricity and hydrogen production in bioelectrochemical systems                                                                                                           | 10.1016/j.ijhydene.2013.10.151                        |
| 2014 | Production of fermentable sugars and polyhydroxybutyrate from hybrid poplar: Response surface model optimization of a hot-water pretreatment and subsequent enzymatic hydrolysis                       | 10.1016/j.biombioe.2014.09.030                        |
| 2014 | Enhancement in hydrogen production by co-cultures of <i>Bacillus</i> and <i>Enterobacter</i>                                                                                                           | 10.1016/j.ijhydene.2014.07.084                        |
| 2014 | Trehalose enhancing microbial electrolysis cell for hydrogen generation in low temperature (0°C)                                                                                                       | 10.1016/j.biortech.2014.05.018                        |
| 2014 | The source of inoculum plays a defining role in the development of MEC microbial consortia fed with acetic and propionic acid mixtures                                                                 | 10.1016/j.jbiotec.2014.04.016                         |
| 2014 | Gamma irradiation as a pretreatment method for enriching hydrogen-producing bacteria from digested sludge                                                                                              | 10.1016/j.ijhydene.2014.01.147                        |
| 2014 | Ultrasonic pretreatment for an enhancement of biohydrogen production from complex food waste                                                                                                           | 10.1016/j.ijhydene.2014.03.105                        |
| 2014 | Enriching hydrogen-producing bacteria from digested sludge by different pretreatment methods                                                                                                           | 10.1016/j.ijhydene.2014.01.145                        |
| 2014 | Effect of system optimizing conditions on biohydrogen production from herbal wastewater by slaughterhouse sludge                                                                                       | 10.1016/j.ijhydene.2014.02.026                        |
| 2014 | Impacts of pH, temperature, and pretreatment method on biohydrogen production from organic wastes by sewage microflora                                                                                 | 10.1186/2251-6832-5-6                                 |
| 2014 | Optimization of high-solid waste activated sludge concentration for hydrogen production in microbial electrolysis cells and microbial community diversity analysis                                     | 10.1016/j.ijhydene.2014.09.163                        |
| 2014 | Vegetable waste as substrate and source of suitable microflora for bio-hydrogen production                                                                                                             | 10.1016/j.renene.2014.01.013                          |
| 2014 | Revealing the factors influencing a fermentative biohydrogen production process using industrial wastewater as fermentation substrate                                                                  | 10.1186/s13068-014-0139-1                             |
| 2014 | Fermentative hydrogen production from carob pod: A typical mediterranean forest fruit                                                                                                                  | 10.1007/s12649-014-9295-6                             |
| 2014 | Dynamic microwave-assisted alkali pretreatment of cornstalk to enhance hydrogen production via co-culture fermentation of <i>Clostridium thermocellum</i> and <i>Clostridium thermosaccharolyticum</i> | 10.1016/j.biombioe.2014.03.053                        |
| 2014 | Ecobiotechnological Strategy to Enhance Efficiency of Bioconversion of Wastes into Hydrogen and Methane                                                                                                | 10.1007/s12088-014-0467-7                             |
| 2014 | Systematic approach to assess biohydrogen potential of anaerobic sludge and soil rhizobia as biocatalysts: Influence of crucial factors affecting acidogenic fermentation                              | 10.1016/j.biortech.2014.02.097                        |
| 2014 | A novel way to utilize hydrogen and carbon dioxide in acidogenic reactor through homoacetogenesis                                                                                                      | 10.1016/j.biortech.2014.02.014                        |
| 2014 | From hypertrophic lagoons to bioenergy production                                                                                                                                                      | NA                                                    |
| 2014 | Total solid content drives hydrogen production through microbial selection during thermophilic fermentation                                                                                            | 10.1016/j.biortech.2014.05.078                        |
| 2014 | Co-producing hydrogen and methane from higher-concentration of corn stalk by combining hydrogen fermentation and anaerobic digestion                                                                   | 10.1016/j.ijhydene.2014.02.089                        |
| 2014 | Biohydrogen and polyhydroxyalkanoate co-production by <i>Enterobacter aerogenes</i> and <i>Rhodobacter sphaeroides</i> from <i>Calophyllum inophyllum</i> oil cake                                     | 10.1016/j.biortech.2014.04.104                        |
| 2014 | Ammonia as carbon-free substrate for hydrogen production in bioelectrochemical systems                                                                                                                 | 10.1016/j.ijhydene.2014.05.176<br>Short Communication |
| 2014 | Influence of setup and carbon source on the bacterial community of biocathodes in microbial electrolysis cells                                                                                         | 10.1016/j.enzmictec.2014.04.019                       |
| 2014 | Modeling and Optimization of Biohydrogen Production from De-oiled <i>Jatropha</i> Using the Response Surface Method                                                                                    | 10.1007/s13369-014-1502-z                             |
| 2014 | Enhanced bio-hydrogenesis by co-culturing photosynthetic bacteria with acidogenic process: Augmented dark-photo fermentative hybrid system to regulate volatile fatty acid inhibition                  | 10.1016/j.ijhydene.2014.01.196                        |
| 2014 | Dark fermentation from real solid waste. Evolution of microbial community                                                                                                                              | 10.1016/j.biortech.2013.10.063                        |

|      |                                                                                                                                                                                                                        |                                |
|------|------------------------------------------------------------------------------------------------------------------------------------------------------------------------------------------------------------------------|--------------------------------|
| 2013 | Dynamics of cathode-associated microbial communities and metabolite profiles in a glycerol-fed bioelectrochemical system                                                                                               | 10.1128/AEM.00569-13           |
| 2013 | Pentoses, hexoses and glycerin as substrates for biohydrogen production: An approach for Brazilian biofuel integration                                                                                                 | 10.1016/j.ijhydene.2012.12.103 |
| 2013 | The membraneless bioelectrochemical reactor stimulates hydrogen fermentation by inhibiting methanogenic archaea                                                                                                        | 10.1007/s00253-012-4465-6      |
| 2013 | Altering protein conformation to improve fermentative hydrogen production from protein wastewater                                                                                                                      | 10.1016/j.watres.2013.06.047   |
| 2013 | Selective carboxylate production by controlling hydrogen, carbon dioxide and substrate concentrations in mixed culture fermentation                                                                                    | 10.1016/j.biortech.2013.03.063 |
| 2013 | Effect of hydraulic retention time on biohydrogen and volatile fatty acids production during acidogenic digestion of dephenolized olive mill wastewaters                                                               | 10.1016/j.biombioe.2012.10.028 |
| 2013 | Microbial consortia for hydrogen production enhancement                                                                                                                                                                | 10.1007/s00284-013-0328-3      |
| 2013 | Fermentative hydrogen production from beet sugar factory wastewater treatment in a continuous stirred tank reactor using anaerobic mixed consortia                                                                     | 10.1007/s11783-012-0456-1      |
| 2013 | Effects of inoculum and indigenous microflora on hydrogen production from the organic fraction of municipal solid waste                                                                                                | 10.1016/j.ijhydene.2013.06.137 |
| 2013 | Cellulosic hydrogen production and microbial community characterization in hyper-thermophilic continuous bioreactor                                                                                                    | 10.1016/j.ijhydene.2013.04.041 |
| 2013 | Enrichment of activated sludge for enhanced hydrogen production from crude glycerol                                                                                                                                    | 10.1016/j.ijhydene.2012.11.069 |
| 2013 | Short-chain fatty acid production from different biological phosphorus removal sludges: The influences of PHA and gram-staining bacteria                                                                               | 10.1021/es304673s              |
| 2013 | A comparison of treatment techniques to enhance fermentative hydrogen production from piggery anaerobic digested residues                                                                                              | 10.1016/j.ijhydene.2013.05.013 |
| 2013 | Promoting chain elongation in mixed culture acidification reactors by addition of ethanol                                                                                                                              | 10.1016/j.biombioe.2012.11.019 |
| 2013 | Biological hydrogen production by anaerobic digestion of food waste and sewage sludge treated using various pretreatment technologies                                                                                  | 10.1007/s10532-013-9623-8      |
| 2013 | Enhanced start-up of anaerobic facultatively autotrophic biocathodes in bioelectrochemical systems                                                                                                                     | 10.1016/j.jbiotec.2013.10.001  |
| 2013 | Bio-hydrogen production during acidogenic fermentation in a multistage stirred tank reactor                                                                                                                            | 10.1016/j.ijhydene.2012.11.077 |
| 2013 | Optimizing the production of hydrogen and 1,3-propanediol in anaerobic fermentation of biodiesel glycerol                                                                                                              | 10.1016/j.ijhydene.2012.12.135 |
| 2013 | Enhancement effect of silver nanoparticles on fermentative biohydrogen production using mixed bacteria                                                                                                                 | 10.1016/j.biortech.2013.05.042 |
| 2013 | Specific inhibition of biohydrogen-producing <i>Clostridium</i> sp. after dilute-acid pretreatment of sunflower stalks                                                                                                 | 10.1016/j.ijhydene.2013.07.018 |
| 2013 | Production of acetate from carbon dioxide in bioelectrochemical systems based on autotrophic mixed culture                                                                                                             | 10.4014/jmb.1304.04039         |
| 2013 | A versatile and robust aerotolerant microbial community capable of cellulosic ethanol production                                                                                                                       | 10.1016/j.biortech.2012.10.164 |
| 2013 | A farm-scale pilot plant for biohydrogen and biomethane production by two-stage fermentation                                                                                                                           | 10.4081/jae.2013.(s1):e115     |
| 2013 | Continuous biohydrogen production from fruit wastewater at low pH conditions                                                                                                                                           | 10.1007/s00449-012-0832-z      |
| 2013 | Bioelectrochemical systems for simultaneously production of methane and acetate from carbon dioxide at relatively high rate                                                                                            | 10.1016/j.ijhydene.2012.12.107 |
| 2013 | Fermentative hydrogen production under moderate halophilic conditions                                                                                                                                                  | 10.1016/j.ijhydene.2013.08.035 |
| 2013 | High rate heptanoate production from propionate and ethanol using chain elongation                                                                                                                                     | 10.1016/j.biortech.2013.02.085 |
| 2013 | Biohydrogen production from food waste in batch and semi-continuous conditions: Evaluation of a two-phase approach with digestate recirculation for pH control                                                         | 10.1016/j.ijhydene.2013.01.078 |
| 2013 | Effect of temperature and temperature shock on the stability of continuous cellulosic-hydrogen fermentation                                                                                                            | 10.1016/j.biortech.2013.04.102 |
| 2013 | Hydrogen and methane production from untreated rice straw and raw sewage sludge under thermophilic anaerobic conditions                                                                                                | 10.1016/j.ijhydene.2013.04.079 |
| 2013 | Enhancement of batch biohydrogen production from prehydrolysate of acid treated oil palm empty fruit bunch                                                                                                             | 10.1016/j.ijhydene.2013.01.154 |
| 2013 | Chain elongation of acetate and ethanol in an upflow anaerobic filter for high rate MCFA production                                                                                                                    | 10.1016/j.biortech.2012.10.165 |
| 2013 | Enhanced butanol production by coculture of <i>Clostridium beijerinckii</i> and <i>Clostridium tyrobutyricum</i>                                                                                                       | 10.1016/j.biortech.2013.06.023 |
| 2013 | Sub-dominant bacteria as keystone species in microbial communities producing bio-hydrogen                                                                                                                              | 10.1016/j.ijhydene.2013.02.008 |
| 2013 | Formation of hydrogen-producing granules and microbial community analysis in a UASB reactor                                                                                                                            | 10.1016/j.renene.2012.10.051   |
| 2013 | Relative effect of different inorganic acids on selective enrichment of acidogenic biocatalyst for fermentative biohydrogen production from wastewater                                                                 | 10.1016/j.biortech.2013.08.021 |
| 2013 | Interactions between <i>Clostridium beijerinckii</i> and <i>Geobacter metallireducens</i> in co-culture fermentation with anthrahydroquinone-2, 6-disulfonate (AH2QDS) for enhanced biohydrogen production from xylose | 10.1002/bit.24627              |

|      |                                                                                                                                                                                                          |                                |
|------|----------------------------------------------------------------------------------------------------------------------------------------------------------------------------------------------------------|--------------------------------|
| 2013 | Polyhydroxyalkanoates production by a mixed photosynthetic consortium of bacteria and algae                                                                                                              | 10.1016/j.biortech.2013.01.050 |
| 2013 | Decreased hydrogen production leads to selective butanol production in co-cultures of <i>Clostridium thermocellum</i> and <i>Clostridium saccharoperbutylacetonicum</i> strain N1-4                      | 10.1016/j.jbiosc.2012.08.020   |
| 2013 | Bioelectrochemical production of caproate and caprylate from acetate by mixed cultures                                                                                                                   | 10.1021/sc300168z              |
| 2013 | Influence of linoleic acid, pH and HRT on anaerobic microbial populations and metabolic shifts in ASBRs during dark hydrogen fermentation of lignocellulosic sugars                                      | 10.1016/j.ijhydene.2012.11.137 |
| 2013 | Dark fermentative bio-hydrogen production: Effects of substrate pre-treatment and addition of metal ions or L-cysteine                                                                                   | 10.1016/j.fuel.2013.04.063     |
| 2013 | Lignocellulosic hydrolysates and extracellular electron shuttles for H <sub>2</sub> production using co-culture fermentation with <i>Clostridium beijerinckii</i> and <i>Geobacter metallireducens</i>   | 10.1016/j.biortech.2013.07.106 |
| 2013 | Ozone pretreatment of wheat straw for enhanced biohydrogen production                                                                                                                                    | 10.1016/j.ijhydene.2013.06.063 |
| 2013 | A novel anaerobic co-culture system for bio-hydrogen production from sugarcane bagasse                                                                                                                   | 10.1016/j.biortech.2013.07.018 |
| 2013 | Two-stage alkaline-enzymatic pretreatments to enhance biohydrogen production from sunflower stalks                                                                                                       | 10.1021/es402863v              |
| 2013 | Optimization of hybrid inoculum development techniques for biohydrogen production and preliminary scale up                                                                                               | 10.1016/j.ijhydene.2013.06.129 |
| 2013 | Optimization of biological hydrogen production for anaerobic co-digestion of food waste and wastewater biosolids                                                                                         | 10.1016/j.biortech.2012.12.069 |
| 2013 | Regulation of biohydrogen production by heat-shock pretreatment facilitates selective enrichment of <i>Clostridium</i> sp.                                                                               | 10.1016/j.ijhydene.2013.10.046 |
| 2013 | Biohydrogen production by a mixed photoheterotrophic culture obtained from a Winogradsky column prepared from the sediment of a southern Brazilian lagoon                                                | 10.1016/j.renene.2012.07.011   |
| 2013 | Microbial community structure and dynamics in two-stage vs single-stage thermophilic anaerobic digestion of mixed swine slurry and market bio-waste                                                      | 10.1016/j.watres.2013.01.007   |
| 2013 | Production of hydrogen and methane by one and two stage fermentation of food waste                                                                                                                       | 10.1016/j.ijhydene.2013.05.047 |
| 2013 | Bio-electrolytic conversion of acidogenic effluents to biohydrogen: An integration strategy for higher substrate conversion and product recovery                                                         | 10.1016/j.biortech.2013.01.029 |
| 2013 | Effect of acid, heat and combined acid-heat pretreatments of anaerobic sludge on hydrogen production by anaerobic mixed cultures                                                                         | 10.1016/j.ijhydene.2012.12.138 |
| 2013 | Effect of ozone pretreatment on hydrogen production from barley straw                                                                                                                                    | 10.1016/j.biortech.2013.07.001 |
| 2013 | Effect of ammonia on biohydrogen production from food waste via anaerobic fermentation                                                                                                                   | 10.1016/j.ijhydene.2013.06.093 |
| 2013 | Hydrogen production by anaerobic digestion of pig manure: Effect of operating conditions                                                                                                                 | 10.1016/j.renene.2012.11.024   |
| 2013 | Effect of thermal pre-treatment on inoculum sludge to enhance bio-hydrogen production from alkali hydrolysed rice straw in a mesophilic anaerobic baffled reactor                                        | 10.1080/09593330.2013.824013   |
| 2013 | Hydrogen-methane production from pulp & paper sludge and food waste by mesophilic-thermophilic anaerobic co-digestion                                                                                    | 10.1016/j.ijhydene.2012.01.051 |
| 2013 | Improved bioproduction of short-chain fatty acids from waste activated sludge by perennial ryegrass addition                                                                                             | 10.1016/j.watres.2013.05.012   |
| 2013 | Bioelectrochemical analyses of a thermophilic biocathode catalyzing sustainable hydrogen production                                                                                                      | 10.1016/j.ijhydene.2013.04.116 |
| 2013 | Total solids content: A key parameter of metabolic pathways in dry anaerobic digestion                                                                                                                   | 10.1186/1754-6834-6-164        |
| 2012 | Mesophilic fermentative hydrogen production from sago starch-processing wastewater using enriched mixed cultures                                                                                         | 10.1016/j.ijhydene.2012.04.027 |
| 2012 | Volatile fatty acids production from marine macroalgae by anaerobic fermentation                                                                                                                         | 10.1016/j.biortech.2012.08.081 |
| 2012 | Biohydrogen production from waste glycerol and sludge by anaerobic mixed cultures                                                                                                                        | 10.1016/j.ijhydene.2012.03.126 |
| 2012 | Acidic and alkaline shock pretreatment to enrich acidogenic biohydrogen producing mixed culture: Long term synergetic evaluation of microbial inventory, dehydrogenase activity and bio-electro kinetics | 10.1039/c2ra20526b             |
| 2012 | Inhibition of fermentative hydrogen production by lignocellulose-derived compounds in mixed cultures                                                                                                     | 10.1016/j.ijhydene.2011.11.033 |
| 2012 | Simultaneous hydrogen and ethanol production from sweet potato via dark fermentation                                                                                                                     | 10.1016/j.jclepro.2011.12.027  |
| 2012 | Optimizing biohydrogen production from mushroom cultivation waste using anaerobic mixed cultures                                                                                                         | 10.1016/j.ijhydene.2012.02.135 |
| 2012 | Enhanced production of volatile fatty acids (VFAs) from sewage sludge by beta-cyclodextrin                                                                                                               | 10.1016/j.biortech.2011.08.122 |
| 2012 | Fermentative hydrogen production from soybean protein processing wastewater in an anaerobic baffled reactor (ABR) using anaerobic mixed consortia                                                        | 10.1007/s12010-011-9357-1      |
| 2012 | Hydrogen production from vegetable waste by bioaugmentation of indigenous fermentative communities                                                                                                       | 10.1016/j.ijhydene.2011.12.159 |
| 2012 | Dark fermentative hydrogen production by mixed anaerobic cultures: Effect of inoculum treatment methods on hydrogen yield                                                                                | 10.1016/j.renene.2012.04.015   |
| 2012 | Metabolic pathways of hydrogen production in fermentative acidogenic microflora                                                                                                                          | 10.4014/jmb.1110.10076         |
| 2012 | Construction of hydrogen fermentation from garbage slurry using the membrane free bioelectrochemical system                                                                                              | 10.1016/j.jbiosc.2012.02.028   |

|      |                                                                                                                                                                                |                                |
|------|--------------------------------------------------------------------------------------------------------------------------------------------------------------------------------|--------------------------------|
| 2012 | Thermophilic dark fermentation of untreated rice straw using mixed cultures for hydrogen production                                                                            | 10.1016/j.ijhydene.2012.01.036 |
| 2012 | Effect of carbonate on anaerobic acidogenesis and fermentative hydrogen production from glucose using leachate as supplementary culture under alkaline conditions              | 10.1016/j.biortech.2012.02.115 |
| 2012 | Enhancement of fermentative hydrogen production in an extreme-thermophilic (70°C) mixed-culture environment by repeated batch cultivation                                      | 10.1007/s00284-012-0088-5      |
| 2012 | Effect of microwave irradiation pretreatment of cow dung compost on bio-hydrogen process from corn stalk by dark fermentation                                                  | 10.1016/j.ijhydene.2012.01.121 |
| 2012 | Feasible pretreatment of textile wastewater for dark fermentative hydrogen production                                                                                          | 10.1016/j.ijhydene.2012.03.131 |
| 2012 | Enhanced hydrogen production in a UASB reactor by retaining microbial consortium onto carbon nanotubes (CNTs)                                                                  | 10.1016/j.ijhydene.2012.04.057 |
| 2012 | Metabolic and microbial community dynamics during the hydrolytic and acidogenic fermentation in a leach-bed process                                                            | 10.1186/2192-0567-2-13         |
| 2012 | Statistical optimization of biohydrogen and ethanol production from crude glycerol by microbial mixed culture                                                                  | 10.1016/j.ijhydene.2012.02.106 |
| 2012 | Fermentative hydrogen production from glucose and starch using pure strains and artificial co-cultures of <i>Clostridium</i> spp.                                              | 10.1186/1754-6834-5-35         |
| 2012 | Gas controlled hydrogen fermentation                                                                                                                                           | 10.1016/j.biortech.2012.01.122 |
| 2012 | Innovative CO <sub>2</sub> pretreatment for enhancing biohydrogen production from the organic fraction of municipal solid waste (OFMSW)                                        | 10.1016/j.ijhydene.2012.06.111 |
| 2012 | Effects of pretreatment of natural bacterial source and raw material on fermentative biohydrogen production                                                                    | 10.1016/j.ijhydene.2011.04.050 |
| 2012 | Effect of sludge recirculation on characteristics of hydrogen production in a two-stage hydrogen-methane fermentation process treating food wastes                             | 10.1016/j.ijhydene.2011.12.123 |
| 2012 | Dark fermentative hydrogen production from xylose by a hot spring enrichment culture                                                                                           | 10.1016/j.ijhydene.2012.05.158 |
| 2012 | Enzymatic dynamics of microbial acid tolerance response (ATR) during the enhanced biohydrogen production process via anaerobic digestion                                       | 10.1016/j.ijhydene.2012.04.116 |
| 2012 | Effect of temperature on continuous hydrogen production of cellulose                                                                                                           | 10.1016/j.ijhydene.2012.04.128 |
| 2012 | Bioreactor performance and quantitative analysis of methanogenic and bacterial community dynamics in microbial electrolysis cells during large temperature fluctuations        | 10.1021/es300860a              |
| 2012 | Bioconversion of crude glycerol from biodiesel production to hydrogen                                                                                                          | 10.1016/j.ijhydene.2012.06.010 |
| 2012 | Biohydrogen production from arabinose and glucose using extreme thermophilic anaerobic mixed cultures                                                                          | 10.1186/1754-6834-5-6          |
| 2012 | Hydrogen supersaturation in thermophilic mixed culture fermentation                                                                                                            | 10.1016/j.ijhydene.2012.09.019 |
| 2012 | Thermophilic fermentative hydrogen production from various carbon sources by anaerobic mixed cultures                                                                          | 10.1016/j.ijhydene.2011.07.043 |
| 2012 | Effect of different gas releasing methods on anaerobic fermentative hydrogen production in batch cultures                                                                      | 10.1007/s11783-012-0403-1      |
| 2012 | By-products inhibition effects on bio-hydrogen production                                                                                                                      | 10.1016/j.ijhydene.2011.12.032 |
| 2012 | Syntrophic metabolism of a co-culture containing <i>Clostridium cellulolyticum</i> and <i>Rhodospseudomonas palustris</i> for hydrogen production                              | 10.1016/j.ijhydene.2012.05.100 |
| 2012 | Co-culture of <i>Clostridium thermocellum</i> and <i>Clostridium thermosaccharolyticum</i> for enhancing hydrogen production via thermophilic fermentation of cornstarch waste | 10.1016/j.ijhydene.2012.04.115 |
| 2012 | Innovative self-powered submersible microbial electrolysis cell (SMEC) for biohydrogen production from anaerobic reactors                                                      | 10.1016/j.watres.2012.02.038   |
| 2012 | Changes in dominant fermentation type during anaerobic digestion of high-loading glycerol with slight glucose content                                                          | 10.1016/j.biortech.2012.09.028 |
| 2012 | Characterization of microbial communities during anode biofilm reformation in a two-chambered microbial electrolysis cell (MEC)                                                | 10.1016/j.jbiotec.2011.09.010  |
| 2012 | Hydrogen production from butyrate by a marine mixed phototrophic bacterial consort                                                                                             | 10.1016/j.ijhydene.2011.11.101 |
| 2012 | Hydrogen and volatile fatty acid production during fermentation of cellulosic substrates by a thermophilic consortium at 50 and 60°C                                           | 10.1016/j.biortech.2011.11.013 |
| 2012 | Biohydrogen production by dark fermentation of starch using mixed bacterial cultures of <i>Bacillus</i> sp and <i>Brevundimonas</i> sp.                                        | 10.1021/ef300666m              |
| 2012 | Effects of pretreatment method of natural bacteria source on microbial community and bio-hydrogen production by dark fermentation                                              | 10.1016/j.ijhydene.2012.01.010 |
| 2012 | Assessing the impact of palmitic, myristic and lauric acids on hydrogen production from glucose fermentation by mixed anaerobic granular cultures                              | 10.1016/j.ijhydene.2012.09.116 |
| 2012 | Pretreating mixed anaerobic communities from different sources: Correlating the hydrogen yield with hydrogenase activity and microbial diversity                               | 10.1016/j.ijhydene.2012.05.105 |
| 2012 | 1,3-propanediol production from glucose by mixed-culture fermentation of <i>Zygosaccharomyces rouxii</i> and <i>Klebsiella pneumonia</i>                                       | 10.1002/elsc.201100238         |
| 2012 | Effect of enzyme addition on fermentative hydrogen production from wheat straw                                                                                                 | 10.1016/j.ijhydene.2012.04.083 |
| 2012 | Effects of heat treatment on microbial communities of granular sludge for biological hydrogen production                                                                       | 10.2166/wst.2012.336           |

|      |                                                                                                                                                                                         |                                |
|------|-----------------------------------------------------------------------------------------------------------------------------------------------------------------------------------------|--------------------------------|
| 2012 | Biohydrogen production by anaerobic co-digestion of press mud and domestic sewage                                                                                                       | 10.1504/IJEW.2012.048323       |
| 2012 | Effects of pH and Carbon Sources on Biohydrogen Production by Co-Culture of <i>Clostridium butyricum</i> and <i>Rhodobacter sphaeroides</i>                                             | 10.4014/jmb.1108.08009         |
| 2012 | Hydrogen production by anaerobic co-digestion of rice straw and sewage sludge                                                                                                           | 10.1016/j.ijhydene.2011.10.116 |
| 2012 | Hydrogen production and microbial diversity in sewage sludge fermentation preceded by heat and alkaline treatment                                                                       | 10.1016/j.biortech.2012.01.048 |
| 2012 | Mixed-culture polyhydroxyalkanoate production from olive oil mill pomace                                                                                                                | 10.1016/j.biortech.2012.06.024 |
| 2012 | Hydrogen production from food wastes and gas post-treatment by CO <sub>2</sub> adsorption                                                                                               | 10.1016/j.wasman.2011.09.003   |
| 2012 | Regulating biohydrogen production from wastewater by applying organic load-shock: Change in the microbial community structure and bio-electrochemical behavior over long-term operation | 10.1016/j.ijhydene.2012.08.124 |
| 2012 | Microbial community analysis of mixed anaerobic microflora in suspended sludge of ASBR producing hydrogen from palm oil mill effluent                                                   | 10.1016/j.ijhydene.2011.11.063 |
| 2012 | Impact of low lignin containing brown midrib sorghum mutants to harness biohydrogen production using mixed anaerobic consortia                                                          | 10.1016/j.ijhydene.2011.11.082 |
| 2012 | High biomass sorghum as a potential raw material for biohydrogen production: A preliminary evaluation                                                                                   | NA                             |
| 2012 | Prolonged cultivation of an anaerobic bacterial community producing hydrogen.                                                                                                           | NA                             |
| 2012 | Selection of natural bacterial communities for the biological production of hydrogen                                                                                                    | 10.1016/j.ijhydene.2012.01.156 |
| 2012 | Two-stage anaerobic process for bio-hydrogen and bio-methane combined production from biodegradable solid wastes                                                                        | 10.1016/j.energy.2011.08.039   |
| 2012 | Influence of aerobic and anoxic microenvironments on polyhydroxyalkanoates (PHA) production from food waste and acidogenic effluents using aerobic consortia                            | 10.1016/j.biortech.2011.09.040 |
| 2012 | Enhanced lipid and biodiesel production from glucose-fed activated sludge: Kinetics and microbial community analysis                                                                    | 10.1002/aic.12655              |
| 2012 | Chain elongation with reactor microbiomes: Upgrading dilute ethanol to medium-chain carboxylates                                                                                        | 10.1039/c2ee22101b             |
| 2012 | Photofermentative hydrogen production using <i>Rhodobium marinum</i> from bagasse and soy sauce wastewater                                                                              | 10.1016/j.ijhydene.2012.06.076 |
| 2012 | Design of a novel biohythane process with high H <sub>2</sub> and CH <sub>4</sub> production rates                                                                                      | 10.1016/j.ijhydene.2012.08.092 |
| 2011 | The buffer composition impacts the hydrogen production and the microbial community composition in non-axenic cultures                                                                   | 10.1016/j.biombioe.2011.04.046 |
| 2011 | Bioconversion of wheat stalk to hydrogen by dark fermentation: Effect of different mixed microflora on hydrogen yield and cellulose solubilisation                                      | 10.1016/j.biortech.2010.11.092 |
| 2011 | Effects of heat treatment on hydrogen production potential and microbial community of thermophilic compost enrichment cultures                                                          | 10.1016/j.biortech.2010.12.072 |
| 2011 | Bioplastic production using wood mill effluents as feedstock                                                                                                                            | 10.2166/wst.2011.358           |
| 2011 | Comparison of different pretreatment methods for hydrogen production using environmental microbial consortia on residual glycerol from biodiesel                                        | 10.1016/j.ijhydene.2011.01.005 |
| 2011 | Strategies to suppress hydrogen-consuming microorganisms affect macro and micro scale structure and microbiology of granular sludge                                                     | 10.1002/bit.23145              |
| 2011 | A pilot-scale high-rate biohydrogen production system with mixed microflora                                                                                                             | 10.1016/j.ijhydene.2010.07.115 |
| 2011 | Co-digestion of swine manure and corn stover for bioenergy production in MixAlco™ consolidated bioprocessing                                                                            | 10.1016/j.biombioe.2011.06.053 |
| 2011 | Performance and microbial community analysis of two-stage process with extreme thermophilic hydrogen and thermophilic methane production from hydrolysate in UASB reactors              | 10.1016/j.biortech.2010.12.009 |
| 2011 | Phase holdups and microbial community in high-rate fermentative hydrogen bioreactors                                                                                                    | 10.1016/j.ijhydene.2010.09.059 |
| 2011 | Biohydrogen and methane production by co-digestion of cassava stillage and excess sludge under thermophilic condition                                                                   | 10.1016/j.biortech.2010.12.012 |
| 2011 | H <sub>2</sub> consumption by anaerobic non-methanogenic mixed cultures                                                                                                                 | 10.2166/wst.2011.214           |
| 2011 | Biohydrogen production from desugared molasses (DM) using thermophilic mixed cultures immobilized on heat treated anaerobic sludge granules                                             | 10.1016/j.ijhydene.2011.06.130 |
| 2011 | Optimization of fermentative biohydrogen production by response surface methodology using fresh leachate as nutrient supplement                                                         | 10.1016/j.biortech.2011.03.002 |
| 2011 | Enhanced biohydrogen production from tofu residue by acid/base pretreatment and sewage sludge addition                                                                                  | 10.1016/j.ijhydene.2011.03.085 |
| 2011 | Performance and population analysis of hydrogen production from sugarcane juice by non-sterile continuous stirred tank reactor augmented with <i>Clostridium butyricum</i>              | 10.1016/j.ijhydene.2010.05.120 |
| 2011 | Anaerobic thermophilic fermentation for carboxylic acid production from in-storage air-lime-treated sugarcane bagasse                                                                   | 10.1007/s00253-011-3178-6      |
| 2011 | Biohydrogen production from sugarcane bagasse hydrolysate by elephant dung: Effects of initial pH and substrate concentration                                                           | 10.1016/j.ijhydene.2010.05.119 |
| 2011 | Enhancement of substrate solubilization and hydrogen production from kitchen wastes by pH pretreatment                                                                                  | 10.1080/09593330.2010.482596   |
| 2011 | Fermentative hydrogen production from lipid-extracted microalgal biomass residues                                                                                                       | 10.1016/j.apenergy.2010.09.009 |



|      |                                                                                                                                                                                                     |                                 |
|------|-----------------------------------------------------------------------------------------------------------------------------------------------------------------------------------------------------|---------------------------------|
| 2011 | Effects of different pretreatment strategies on corn stalk acidogenic fermentation using a microbial consortium                                                                                     | 10.1016/j.biortech.2011.04.083  |
| 2011 | Co-digestion of food waste and sludge for hydrogen production by anaerobic mixed cultures: Statistical key factors optimization                                                                     | 10.1016/j.ijhydene.2011.05.145  |
| 2011 | Optimization of two-phase thermophilic anaerobic digestion of biowaste for hydrogen and methane production through reject water recirculation                                                       | 10.1016/j.biortech.2011.03.084  |
| 2011 | Upgrading of straw hydrolysate for production of hydrogen and phenols in a microbial electrolysis cell (MEC)                                                                                        | 10.1007/s00253-010-3068-3       |
| 2011 | Hydrogen production, methanogen inhibition and microbial community structures in psychrophilic single-chamber microbial electrolysis cells                                                          | 10.1039/c0ee00588f              |
| 2011 | Functional versus phylogenetic fingerprint analyses for monitoring hydrogen-producing bacterial populations in dark fermentation cultures                                                           | 10.1016/j.ijhydene.2010.12.100  |
| 2011 | Developing a thermophilic hydrogen-producing microbial consortia from geothermal spring for efficient utilization of xylose and glucose mixed substrates and oil palm trunk hydrolysate             | 10.1016/j.ijhydene.2010.09.067  |
| 2011 | Comparative analysis of hydrogen-producing bacterial biofilms and granular sludge formed in continuous cultures of fermentative bacteria                                                            | 10.1016/j.biortech.2011.08.063  |
| 2011 | Changes in hydrogenase genetic diversity and proteomic patterns in mixed-culture dark fermentation of mono-, di- and tri-saccharides                                                                | 10.1016/j.ijhydene.2011.06.010  |
| 2011 | Enhancement of bioenergy production from organic wastes by two-stage anaerobic hydrogen and methane production process                                                                              | 10.1016/j.biortech.2011.02.012  |
| 2011 | Effects of various pretreatment methods of anaerobic mixed microflora on biohydrogen production and the fermentation pathway of glucose                                                             | 10.1016/j.ijhydene.2010.09.092  |
| 2011 | Thermophilic, anaerobic co-digestion of microalgal biomass and cellulose for H <sub>2</sub> production                                                                                              | 10.1007/s10532-010-9419-z       |
| 2011 | Fermentative hydrogen production by <i>Clostridium butyricum</i> and <i>Escherichia coli</i> in pure and cocultures                                                                                 | 10.1016/j.ijhydene.2011.05.189  |
| 2011 | Comparative study of biological hydrogen production by pure strains and consortia of facultative and strict anaerobic bacteria                                                                      | 10.1016/j.biortech.2010.11.094  |
| 2011 | Eliminating methanogenic activity in hydrogen reactor to improve biogas production in a two-stage anaerobic digestion process co-digesting municipal food waste and sewage sludge                   | 10.1016/j.biortech.2011.04.047  |
| 2011 | Mixed culture polyhydroxyalkanoate (PHA) production from volatile fatty acid (VFA)-rich streams: Effect of substrate composition and feeding regime on PHA productivity, composition and properties | 10.1016/j.jbiotec.2010.10.070   |
| 2011 | Effects of various pretreatment methods on mixed microflora to enhance biohydrogen production from corn stover hydrolysate                                                                          | 10.1016/S1001-0742(10)60679-1   |
| 2011 | Bioplastic production using wood mill effluents as feedstock                                                                                                                                        | 10.2166/wst.2011.358            |
| 2011 | Biohydrogen production from mixed xylose/arabinose at thermophilic temperature by anaerobic mixed cultures in elephant dung                                                                         | 10.1016/j.ijhydene.2011.03.098  |
| 2011 | Direct fermentation of <i>Laminaria japonica</i> for biohydrogen production by anaerobic mixed cultures                                                                                             | 10.1016/j.ijhydene.2011.01.125  |
| 2011 | Bio-hydrogen behavior of suspended and attached microorganisms in anaerobic fluidized bed                                                                                                           | 10.1016/j.ijhydene.2010.10.004  |
| 2011 | Revivability of fermentative hydrogen producing bioreactors                                                                                                                                         | 10.1016/j.ijhydene.2010.11.038  |
| 2011 | Hydrogen production by mixed bacteria through dark and photo fermentation                                                                                                                           | 10.1016/j.ijhydene.2010.10.007  |
| 2011 | Enhancement of anaerobic biohydrogen/methane production from cellulose using heat-treated activated sludge                                                                                          | 10.2166/wst.2011.390            |
| 2011 | Influence of carbohydrates and proteins concentration on fermentative hydrogen production using canteen based waste under acidophilic microenvironment                                              | 10.1016/j.jbiotec.2011.07.030   |
| 2011 | Integrated hydrogen production process from cellulose by combining dark fermentation, microbial fuel cells, and a microbial electrolysis cell                                                       | 10.1016/j.biortech.2010.10.137  |
| 2011 | Biological hydrogen production from sweet sorghum syrup by mixed cultures using an anaerobic sequencing batch reactor (ASBR)                                                                        | 10.1016/j.ijhydene.2010.08.058  |
| 2011 | Biohydrogen production from dairy processing wastewater by anaerobic biofilm reactors                                                                                                               | NA                              |
| 2011 | Feasibility of hydrogen production from ripened fruits by a combined two-stage (dark/dark) fermentation system                                                                                      | 10.1016/j.biortech.2010.08.047  |
| 2011 | Quantitative analysis of microorganism composition in a pilot-scale fermentative biohydrogen production system                                                                                      | 10.1016/j.ijhydene.2011.05.023  |
| 2011 | Optimization of key factors affecting hydrogen production from food waste by anaerobic mixed cultures                                                                                               | 10.1016/j.ijhydene.2011.04.136  |
| 2011 | Bio-hydrogen production from thin stillage using conventional and acclimatized anaerobic digester sludge                                                                                            | 10.1016/j.ijhydene.2011.07.032  |
| 2011 | Effect of temperature and initial pH on biohydrogen production from palm oil mill effluent: Long-term evaluation and microbial community analysis                                                   | 10.2225/vol14-issue5-fulltext-9 |
| 2011 | Dark fermentative bio-hydrogen production from waste wheat starch using co-culture with periodic feeding: Effects of substrate loading rate                                                         | 10.1016/j.ijhydene.2011.03.071  |
| 2011 | Microalgal community and their growth conditions influence biohydrogen production during integration of dark-fermentation and photo-fermentation processes                                          | 10.1016/j.ijhydene.2011.07.007  |
| 2011 | Hydrogen production from sludge of poultry slaughterhouse wastewater treatment plant pretreated with microwave                                                                                      | 10.1016/j.ijhydene.2010.07.073  |

|      |                                                                                                                                                                                         |                                |
|------|-----------------------------------------------------------------------------------------------------------------------------------------------------------------------------------------|--------------------------------|
| 2011 | Biohydrogen production from cassava starch processing wastewater by thermophilic mixed cultures                                                                                         | 10.1016/j.ijhydene.2010.12.053 |
| 2011 | Long-term effect of inoculum pretreatment on fermentative hydrogen production by repeated batch cultivations: Homoacetogenesis and methanogenesis as competitors to hydrogen production | 10.1002/bit.23122              |
| 2011 | Flux balance analysis of mixed anaerobic microbial communities: Effects of linoleic acid (LA) and pH on biohydrogen production                                                          | 10.1016/j.ijhydene.2011.04.161 |
| 2011 | Combined effects of temperature and pH on biohydrogen production by anaerobic digested sludge                                                                                           | 10.1016/j.biombioe.2011.06.016 |
| 2011 | Effects of temperature and initial pH on biohydrogen production from food-processing wastewater using anaerobic mixed cultures                                                          | 10.1007/s10532-010-9427-z      |
| 2011 | Effect of retention time on biohydrogen production by microbial consortia immobilised in polydimethylsiloxane                                                                           | NA                             |
| 2011 | Assessment of optimum dilution ratio for biohydrogen production by anaerobic co-digestion of press mud with sewage and water                                                            | 10.1016/j.biortech.2010.11.075 |
| 2011 | Energy optimisation from co-digested waste using a two-phase process to generate hydrogen and methane                                                                                   | 10.1016/j.ijhydene.2010.12.118 |
| 2011 | Startup study of UASB reactor treating press mud for biohydrogen production                                                                                                             | 10.1016/j.biombioe.2011.03.016 |
| 2010 | Growth condition and bacterial community for maximum hydrolysis of suspended organic materials in anaerobic digestion of food waste-recycling wastewater                                | 10.1007/s00253-009-2316-x      |
| 2010 | Biohydrogen production from purified terephthalic acid (PTA) processing wastewater by anaerobic fermentation using mixed microbial communities                                          | 10.1016/j.ijhydene.2009.12.003 |
| 2010 | Pilot-scale hydrogen fermentation system start-up performance                                                                                                                           | 10.1016/j.ijhydene.2009.11.123 |
| 2010 | Extreme thermophilic biohydrogen production from wheat straw hydrolysate using mixed culture fermentation: Effect of reactor configuration                                              | 10.1016/j.biortech.2010.05.024 |
| 2010 | Evaluation of biohydrogen production from glucose and protein at neutral initial pH                                                                                                     | 10.1016/j.ijhydene.2010.03.084 |
| 2010 | Development of a simple bio-hydrogen production system through dark fermentation by using unique microflora                                                                             | 10.1016/j.ijhydene.2010.05.113 |
| 2010 | Biohydrogen production from soluble condensed molasses fermentation using anaerobic fermentation                                                                                        | 10.1016/j.ijhydene.2009.11.128 |
| 2010 | Biohydrogen production from wheat straw hydrolysate by dark fermentation using extreme thermophilic mixed culture                                                                       | 10.1002/bit.22616              |
| 2010 | Dark fermentative biohydrogen production by mesophilic bacterial consortia isolated from riverbed sediments                                                                             | 10.1016/j.ijhydene.2010.03.010 |
| 2010 | Effects of butyric acid stress on anaerobic sludge for hydrogen production from kitchen wastes                                                                                          | 10.1002/jctb.2380              |
| 2010 | Effect of changing temperature on anaerobic hydrogen production and microbial community composition in an open-mixed culture bioreactor                                                 | 10.1016/j.ijhydene.2010.07.070 |
| 2010 | Production of hexanoic acid from d-galactitol by a newly isolated <i>Clostridium</i> sp. BS-1                                                                                           | 10.1007/s00253-010-2827-5      |
| 2010 | Direction of glucose fermentation towards hydrogen or ethanol production through on-line pH control                                                                                     | 10.1016/j.ijhydene.2010.07.139 |
| 2010 | Hydrogen production from water hyacinth through dark- and photo- fermentation                                                                                                           | 10.1016/j.ijhydene.2010.06.035 |
| 2010 | Hydrogen production with nickel powder cathode catalysts in microbial electrolysis cells                                                                                                | 10.1016/j.ijhydene.2009.11.014 |
| 2010 | Comprehensive study on a two-stage anaerobic digestion process for the sequential production of hydrogen and methane from cost-effective molasses                                       | 10.1016/j.ijhydene.2010.03.135 |
| 2010 | Engineered heat treated methanogenic granules: A promising biotechnological approach for extreme thermophilic biohydrogen production                                                    | 10.1016/j.biortech.2010.07.070 |
| 2010 | Effect of key factors on hydrogen production from cellulose in a co-culture of <i>Clostridium thermocellum</i> and <i>Clostridium thermopalmarum</i>                                    | 10.1016/j.biortech.2010.01.042 |
| 2010 | Characterization of microbial community in the two-stage process for hydrogen and methane production from food waste                                                                    | 10.1016/j.ijhydene.2009.12.021 |
| 2010 | Energy balance of dark anaerobic fermentation as a tool for sustainability analysis                                                                                                     | 10.1016/j.ijhydene.2010.08.014 |
| 2010 | Statistical optimization of biohydrogen production from sucrose by a co-culture of <i>Clostridium acidisoli</i> and <i>Rhodobacter sphaeroides</i>                                      | 10.1016/j.ijhydene.2010.01.145 |
| 2010 | Fermentation of sugarcane bagasse and chicken manure to calcium carboxylates under thermophilic conditions                                                                              | 10.1007/s12010-009-8748-z      |
| 2010 | Effects of hydraulic retention time on anaerobic hydrogenation performance and microbial ecology of bioreactors fed with glucose-peptone and starch-peptone                             | 10.1016/j.ijhydene.2009.10.033 |
| 2010 | Fermentative hydrogen production by <i>Clostridium butyricum</i> CWBI1009 and <i>Citrobacter freundii</i> CWBI952 in pure and mixed cultures                                            | NA                             |
| 2010 | Xylose fermentation to biofuels (hydrogen and ethanol) by extreme thermophilic (70 °C) mixed culture                                                                                    | 10.1016/j.ijhydene.2010.01.082 |
| 2010 | Production of polyhydroxyalkanoates in open, mixed cultures from a waste sludge stream containing high levels of soluble organics, nitrogen and phosphorus                              | 10.1016/j.watres.2010.06.043   |
| 2010 | Bio-hydrogen production by mixed culture of photo- and dark-fermentation bacteria                                                                                                       | 10.1016/j.ijhydene.2009.05.005 |
| 2010 | Effect of microbial composition on thermophilic acid fermentation                                                                                                                       | 10.1016/j.enzmict.2010.06.005  |
| 2010 | Insight into the dehydrogenase catalyzed redox reactions and electron discharge pattern during                                                                                          | 10.1016/j.biortech.2009.10.026 |

|      |                                                                                                                                                                  |                                 |
|------|------------------------------------------------------------------------------------------------------------------------------------------------------------------|---------------------------------|
|      | fermentative hydrogen production                                                                                                                                 |                                 |
| 2010 | Potential use of <i>Bacillus subtilis</i> in a co-culture with <i>Clostridium butylicum</i> for acetone-butanol-ethanol production from cassava starch           | 10.1016/j.bej.2009.11.001       |
| 2010 | Valuable product production from wood mill effluents                                                                                                             | 10.2166/wst.2010.949            |
| 2010 | Control strategies for hydrogen production through co-culture of <i>Ethanoligenens harbinense</i> B49 and immobilized <i>Rhodospseudomonas faecalis</i> RLD-53   | 10.1016/j.ijhydene.2009.12.138  |
| 2010 | Evaluation of pretreatment methods on harvesting hydrogen producing seeds from anaerobic digested organic fraction of municipal solid waste (OFMSW)              | 10.1016/j.ijhydene.2009.12.058  |
| 2010 | Thermophilic biohydrogen production from palm oil mill effluent (POME) using suspended mixed culture                                                             | 10.1016/j.biombioe.2009.09.009  |
| 2010 | Optimization of biohydrogen production from sweet sorghum syrup using statistical methods                                                                        | 10.1016/j.ijhydene.2009.11.122  |
| 2010 | Thermophilic bio-energy process study on hydrogen fermentation with vegetable kitchen waste                                                                      | 10.1016/j.ijhydene.2009.11.126  |
| 2010 | Effects of starch loading rate on performance of combined fed-batch fermentation of ground wheat for bio-hydrogen production                                     | 10.1016/j.ijhydene.2009.11.048  |
| 2010 | Simultaneous effects of pH and substrate concentration on hydrogen production by acidogenic fermentation                                                         | 10.2225/vol13-issue1-fulltext-6 |
| 2010 | Effect of hydrodynamic force and prolonged oxygen exposure on the performance of anodic biofilm in microbial electrolysis cells                                  | 10.1016/j.ijhydene.2010.01.057  |
| 2010 | Bioconversion of corn cob to hydrogen using anaerobic mixed microflora                                                                                           | 10.1016/j.ijhydene.2009.04.023  |
| 2010 | Investigation of the effect of culture type on biological hydrogen production from sugar industry wastes                                                         | 10.1016/j.wasman.2009.11.002    |
| 2010 | Bioelectrochemical ethanol production through mediated acetate reduction by mixed cultures                                                                       | 10.1021/es902371e               |
| 2010 | Fermentative hydrogen production from tofu-processing waste and anaerobic digester sludge using microbial consortium                                             | 10.1016/j.biortech.2009.03.040  |
| 2010 | Comparison of different mixed cultures for bio-hydrogen production from ground wheat starch by combined dark and light fermentation                              | 10.1007/s10295-009-0679-8       |
| 2010 | Biohydrogen production from dairy manures with acidification pretreatment by anaerobic fermentation                                                              | 10.1007/s11356-009-0187-4       |
| 2010 | Metabolic shift and electron discharge pattern of anaerobic consortia as a function of pretreatment method applied during fermentative hydrogen production       | 10.1016/j.ijhydene.2010.02.055  |
| 2010 | Dark fermentative hydrogen production by defined mixed microbial cultures immobilized on ligno-cellulosic waste materials                                        | 10.1016/j.ijhydene.2010.03.025  |
| 2010 | Biohydrogen production from specified risk materials co-digested with cattle manure                                                                              | 10.1016/j.ijhydene.2009.11.072  |
| 2010 | Fermentative effluents from hydrogen producing bioreactor as substrate for poly(beta-OH) butyrate production with simultaneous treatment: An integrated approach | 10.1016/j.biortech.2010.06.109  |
| 2010 | Biohydrogen production process optimization using anaerobic mixed consortia: A prelude study for use of agro-industrial material hydrolysate as substrate        | 10.1016/j.biortech.2010.01.145  |
| 2009 | Continuous biohydrogen production using cheese whey: Improving the hydrogen production rate                                                                      | 10.1016/j.ijhydene.2009.02.063  |
| 2009 | Hydrogen production characteristics of the organic fraction of municipal solid wastes by anaerobic mixed culture fermentation                                    | 10.1016/j.ijhydene.2008.11.031  |
| 2009 | Buffer requirements for enhanced hydrogen production in acidogenic digestion of food wastes                                                                      | 10.1016/j.biortech.2009.02.066  |
| 2009 | Biohydrogen production from pig slurry in a CSTR reactor system with mixed cultures under hyper-thermophilic temperature (70 °C)                                 | 10.1016/j.biombioe.2009.05.001  |
| 2009 | Start-Up of biohydrogen production from palm oil mill effluent under non-sterile condition in 50 L continuous stirred tank reactor                               | 10.3923/ijar.2009.163.168       |
| 2009 | Exploitation of olive oil mill wastewater for combined biohydrogen and biopolymers production                                                                    | 10.1016/j.biortech.2008.12.001  |
| 2009 | Hydrogen fermentation of food waste without inoculum addition                                                                                                    | 10.1016/j.enzmictec.2009.06.013 |
| 2009 | Cellulose-hydrogen production from corn stalk biomass by anaerobic fermentation                                                                                  | 10.1007/s11434-009-0147-x       |
| 2009 | Effect of COD/SO <sub>4</sub> <sup>2-</sup> ratio and Fe(II) under the variable hydraulic retention time (HRT) on fermentative hydrogen production               | 10.1016/j.watres.2009.04.023    |
| 2009 | Efficient hydrogen gas production from cassava and food waste by a two-step process of dark fermentation and photo-fermentation                                  | 10.1016/j.biombioe.2009.06.008  |
| 2009 | Biological hydrogen production from probiotic wastewater as substrate by selectively enriched anaerobic mixed microflora                                         | 10.1016/j.renene.2008.04.016    |
| 2009 | Biohydrogen production from xylose at extreme thermophilic temperatures (70 °C) by mixed culture fermentation                                                    | 10.1016/j.watres.2008.12.016    |
| 2009 | Hydrogen and methane production through two-stage mesophilic anaerobic digestion of olive pulp                                                                   | 10.1016/j.biortech.2009.01.037  |
| 2009 | Improving hydrogen production from cassava starch by combination of dark and photo fermentation                                                                  | 10.1016/j.ijhydene.2008.12.045  |
| 2009 | Hydrogen generation from glycerol in batch fermentation process                                                                                                  | 10.1016/j.ijhydene.2009.02.045  |
| 2009 | Enhanced hydrogen and 1,3-propanediol production from glycerol by fermentation using mixed cultures                                                              | 10.1002/bit.22487               |

|      |                                                                                                                                                                                                          |                                |
|------|----------------------------------------------------------------------------------------------------------------------------------------------------------------------------------------------------------|--------------------------------|
| 2009 | Hydrogen production with effluent from an ethanol-H <sub>2</sub> -coproducing fermentation reactor using a single-chamber microbial electrolysis cell                                                    | 10.1016/j.bios.2009.03.024     |
| 2009 | Towards the integration of dark- and photo-fermentative waste treatment. 2. Optimization of starch-dependent fermentative hydrogen production                                                            | 10.1016/j.ijhydene.2009.02.042 |
| 2009 | Hydrogen production by <i>Geobacter</i> species and a mixed consortium in a microbial electrolysis cell                                                                                                  | 10.1128/AEM.01760-09           |
| 2009 | Biological hydrogen production in an anaerobic sequencing batch reactor: pH and cyclic duration effects                                                                                                  | 10.1016/j.ijhydene.2008.09.061 |
| 2009 | Evaluation of methods for preparing hydrogen-producing seed inocula under thermophilic condition by process performance and microbial community analysis                                                 | 10.1016/j.biortech.2008.07.036 |
| 2009 | Performance and population analysis of a non-sterile trickle bed reactor inoculated with <i>Caldicellulosiruptor saccharolyticus</i> , a thermophilic hydrogen producer                                  | 10.1002/bit.22185              |
| 2009 | Effluents with soluble metabolites generated from acidogenic and methanogenic processes as substrate for additional hydrogen production through photo-biological process                                 | 10.1016/j.ijhydene.2008.11.060 |
| 2009 | Effect of extrinsic lactic acid on fermentative hydrogen production                                                                                                                                      | 10.1016/j.ijhydene.2009.01.010 |
| 2009 | Continuous hydrogen production from glucose by using extreme thermophilic anaerobic microflora                                                                                                           | 10.1016/j.jbiosc.2008.09.010   |
| 2009 | Clostridium strain co-cultures for biohydrogen production enhancement from condensed molasses fermentation solubles                                                                                      | 10.1016/j.ijhydene.2009.06.028 |
| 2009 | Anaerobic digestion of the vinasses from the fermentation of Agave tequilana Weber to tequila: The effect of pH, temperature and hydraulic retention time on the production of hydrogen and methane      | 10.1016/j.biombioe.2008.04.006 |
| 2009 | Bio-hydrogen production from waste fermentation: Mixing and static conditions                                                                                                                            | 10.1016/j.renene.2008.08.011   |
| 2009 | High yield simultaneous hydrogen and ethanol production under extreme-thermophilic (70 °C) mixed culture environment                                                                                     | 10.1016/j.ijhydene.2009.05.057 |
| 2009 | Acetate and butyrate as substrates for hydrogen production through photo-fermentation: Process optimization and combined performance evaluation                                                          | 10.1016/j.ijhydene.2009.05.095 |
| 2009 | Fermentative biohydrogen production by mixed anaerobic consortia: Impact of glucose to xylose ratio                                                                                                      | 10.1016/j.ijhydene.2009.09.104 |
| 2009 | Effect of ammonia concentration on fermentative hydrogen production by mixed cultures                                                                                                                    | 10.1016/j.biortech.2008.08.018 |
| 2009 | Continuous fermentative hydrogen production from cheese whey wastewater under thermophilic anaerobic conditions                                                                                          | 10.1016/j.ijhydene.2009.04.032 |
| 2009 | Microbial culture selection for bio-hydrogen production from waste ground wheat by dark fermentation                                                                                                     | 10.1016/j.ijhydene.2008.12.066 |
| 2009 | Dark and acidic conditions for fermentative hydrogen production                                                                                                                                          | 10.1016/j.ijhydene.2008.11.040 |
| 2009 | Production of hydrogen from marine macro-algae biomass using anaerobic sewage sludge microflora                                                                                                          | 10.1007/s12257-008-0241-y      |
| 2009 | Acidogenic fermentation of vegetable based market waste to harness biohydrogen with simultaneous stabilization                                                                                           | 10.1016/j.biortech.2008.12.059 |
| 2009 | Feasibility of biohydrogen production from cheese whey using a UASB reactor: Links between microbial community and reactor performance                                                                   | 10.1016/j.ijhydene.2009.05.060 |
| 2009 | Bio hydrogen generation from kitchen waste in an inclined plug flow reactor                                                                                                                              | 10.1016/j.ijhydene.2009.08.048 |
| 2009 | Alkalinity and high total solids affecting H <sub>2</sub> production from organic solid waste by anaerobic consortia                                                                                     | 10.1016/j.ijhydene.2009.02.039 |
| 2009 | Novel dark fermentation involving bioaugmentation with constructed bacterial consortium for enhanced biohydrogen production from pretreated sewage sludge                                                | 10.1016/j.ijhydene.2009.05.109 |
| 2009 | Enhancement of hydrogen production from Kitchen Waste using heat treated anaerobic biogas plant slurry with pH control                                                                                   | 10.1504/IJESD.2009.023710      |
| 2009 | Enhancement of waste activated sludge protein conversion and volatile fatty acids accumulation during waste activated sludge anaerobic fermentation by carbohydrate substrate addition: The effect of pH | 10.1021/es8037142              |
| 2009 | Characteristics of hydrogen and methane production from cornstalks by an augmented two- or three-stage anaerobic fermentation process                                                                    | 10.1016/j.biortech.2009.01.023 |
| 2009 | Enhanced methane and hydrogen production from municipal solid waste and agro-industrial by-products co-digested with crude glycerol                                                                      | 10.1016/j.biortech.2009.01.016 |
| 2009 | Effects of acid pre-treatment on bio-hydrogen production and microbial communities during dark fermentation                                                                                              | 10.1016/j.biortech.2008.08.019 |
| 2009 | Source of methane and methods to control its formation in single chamber microbial electrolysis cells                                                                                                    | 10.1016/j.ijhydene.2009.03.005 |
| 2009 | Optimization and evaluation of fermentative hydrogen production and wastewater treatment processes using data enveloping analysis (DEA) and Taguchi design of experimental (DOE) methodology             | 10.1016/j.ijhydene.2008.09.044 |
| 2008 | Anaerobic biohydrogen production from monosaccharides by a mixed microbial community culture                                                                                                             | 10.1016/j.biortech.2007.11.072 |
| 2008 | HRT-dependent hydrogen production and bacterial community structure of mixed anaerobic microflora in suspended, granular and immobilized sludge systems using glucose as the carbon substrate            | 10.1016/j.ijhydene.2007.10.020 |
| 2008 | Microbial community structure of a starch-feeding fermentative hydrogen production reactor operated under different incubation conditions                                                                | 10.1016/j.ijhydene.2008.05.017 |

|      |                                                                                                                                                                                    |                                |
|------|------------------------------------------------------------------------------------------------------------------------------------------------------------------------------------|--------------------------------|
| 2008 | Dark fermentative H <sub>2</sub> production from xylose and lactose-Effects of on-line pH control                                                                                  | 10.1016/j.ijhydene.2007.10.012 |
| 2008 | Enhancement effect of l-cysteine on dark fermentative hydrogen production                                                                                                          | 10.1016/j.ijhydene.2008.07.065 |
| 2008 | Effect of methanogenic inhibitors, inocula type, and temperature on biohydrogen production from food components                                                                    | NA                             |
| 2008 | Enhancement of fermentative hydrogen/ethanol production from cellulose using mixed anaerobic cultures                                                                              | 10.1016/j.ijhydene.2008.04.036 |
| 2008 | Multiple response optimization analysis for pretreatments of Tequila's stillages for VFAs and hydrogen production                                                                  | 10.1016/j.biortech.2007.10.008 |
| 2008 | Biohydrogen production with mixed anaerobic cultures in the presence of high-concentration acetate                                                                                 | 10.1016/j.ijhydene.2007.12.018 |
| 2008 | Dark fermentative hydrogen production from xylose in different bioreactors using sewage sludge microflora                                                                          | 10.1021/ef700286s              |
| 2008 | Co-production of hydrogen and methane from potato waste using a two-stage anaerobic digestion process                                                                              | 10.1016/j.biortech.2007.08.083 |
| 2008 | Biohydrogen production from cattle wastewater by enriched anaerobic mixed consortia: Influence of fermentation temperature and pH                                                  | 10.1263/jbb.106.80             |
| 2008 | Simultaneous biohydrogen production and starch wastewater treatment in an acidogenic expanded granular sludge bed reactor by mixed culture for long-term operation                 | 10.1016/j.ijhydene.2008.09.039 |
| 2008 | Experimental determination by principal component analysis of a reaction pathway of biohydrogen production by anaerobic fermentation                                               | 10.1016/j.cep.2007.12.007      |
| 2008 | Effects of seed sludge on fermentative characteristics and microbial community structures in thermophilic hydrogen fermentation of starch                                          | 10.1016/j.ijhydene.2008.08.038 |
| 2008 | Effects of different pretreatment methods on fermentation types and dominant bacteria for hydrogen production                                                                      | 10.1016/j.ijhydene.2008.06.003 |
| 2008 | Effect of arabinose concentration on dark fermentation hydrogen production using different mixed cultures                                                                          | 10.1016/j.ijhydene.2008.05.060 |
| 2008 | Fermentative hydrogen production from starch using natural mixed cultures                                                                                                          | 10.1016/j.ijhydene.2008.02.069 |
| 2008 | Effect of Fe <sup>2+</sup> concentration on fermentative hydrogen production by mixed cultures                                                                                     | 10.1016/j.ijhydene.2007.12.044 |
| 2008 | Ethanol and hydrogen production by two thermophilic, anaerobic bacteria isolated from Icelandic geothermal areas                                                                   | 10.1002/bit.21942              |
| 2008 | The effect of heat pretreatment temperature on fermentative hydrogen production using mixed cultures                                                                               | 10.1016/j.ijhydene.2008.05.069 |
| 2008 | Biofuels generation from sweet sorghum: Fermentative hydrogen production and anaerobic digestion of the remaining biomass                                                          | 10.1016/j.biortech.2006.11.048 |
| 2008 | Glycerol fermentation by (open) mixed cultures: A chemostat study                                                                                                                  | 10.1002/bit.21857              |
| 2008 | Diversity of microbial communities in open mixed culture fermentations: Impact of the pH and carbon source                                                                         | 10.1007/s00253-008-1669-x      |
| 2008 | High-efficiency hydrogen production by an anaerobic, thermophilic enrichment culture from an icelandic hot spring                                                                  | 10.1002/bit.21948              |
| 2008 | Fermentative hydrogen gas production using biosolids pellets as the inoculum source                                                                                                | 10.1016/j.biortech.2007.01.004 |
| 2008 | Bioaugmented hydrogen production from microcrystalline cellulose using co-culture <i>Clostridium acetobutylicum</i> X9 and <i>Ethanoigenens harbinense</i> B49                     | 10.1016/j.ijhydene.2007.10.017 |
| 2008 | Hydrogen production using single-chamber membrane-free microbial electrolysis cells                                                                                                | 10.1016/j.watres.2008.06.015   |
| 2008 | Bioaugmented hydrogen production from carboxymethyl cellulose and partially delignified corn stalks using isolated cultures                                                        | 10.1016/j.ijhydene.2008.05.020 |
| 2008 | Exploring optimal environmental factors for fermentative hydrogen production from starch using mixed anaerobic microflora                                                          | 10.1016/j.ijhydene.2007.10.019 |
| 2008 | Direct fermentation of fodder maize, chicory fructans and perennial ryegrass to hydrogen using mixed microflora                                                                    | 10.1016/j.biortech.2008.04.047 |
| 2008 | Biohydrogen production via biocatalyzed electrolysis in acetate-fed bioelectrochemical cells and microbial community analysis                                                      | 10.1016/j.ijhydene.2008.05.013 |
| 2008 | Temperature effects on fermentative hydrogen production from xylose using mixed anaerobic cultures                                                                                 | 10.1016/j.ijhydene.2007.09.001 |
| 2008 | Fermentative hydrogen production by microbial consortium                                                                                                                           | 10.1016/j.ijhydene.2008.06.053 |
| 2008 | Influence of Ni <sup>2+</sup> concentration on biohydrogen production                                                                                                              | 10.1016/j.biortech.2008.04.052 |
| 2008 | Effect of temperature on anaerobic fermentative hydrogen gas production from feedlot cattle manure using mixed microflora                                                          | 10.1016/j.ijhydene.2008.06.016 |
| 2008 | Optimization of fermentative hydrogen production process by response surface methodology                                                                                           | 10.1016/j.ijhydene.2008.08.051 |
| 2008 | Enrichment and adaptation of extreme-thermophilic (70°C) hydrogen producing bacteria to organic household solid waste by repeated batch cultivation                                | 10.1016/j.ijhydene.2008.08.014 |
| 2008 | Fermentative production of hydrogen from a wheat flour industry co-product                                                                                                         | 10.1016/j.biortech.2007.09.010 |
| 2008 | Light fermentation of dark fermentation effluent for bio-hydrogen production by different <i>Rhodobacter</i> species at different initial volatile fatty acid (VFA) concentrations | 10.1016/j.ijhydene.2008.09.059 |
| 2008 | Biohydrogen production from household solid waste (HSW) at extreme-thermophilic temperature                                                                                        | 10.1016/j.ijhydene.2008.08.059 |

| (70 °C) - Influence of pH and acetate concentration |                                                                                                                                                                                         |                                  |
|-----------------------------------------------------|-----------------------------------------------------------------------------------------------------------------------------------------------------------------------------------------|----------------------------------|
| 2008                                                | Heavy metal effects on fermentative hydrogen production using natural mixed microflora                                                                                                  | 10.1016/j.ijhydene.2007.09.030   |
| 2008                                                | Kinetic study of pH effects on biological hydrogen production by a mixed culture                                                                                                        | NA                               |
| 2008                                                | Biological hydrogen production using chloroform-treated methanogenic granules                                                                                                           | 10.1007/s12010-007-8048-4        |
| 2008                                                | Bio-electrochemical evaluation of fermentative hydrogen production process with the function of feeding pH                                                                              | 10.1016/j.ijhydene.2008.05.073   |
| 2008                                                | Biohydrogen production by anaerobic co-digestion of municipal food waste and sewage sludges                                                                                             | 10.1016/j.ijhydene.2008.04.040   |
| 2008                                                | Self-immobilization of acidogenic mixed consortia on mesoporous material (SBA-15) and activated carbon to enhance fermentative hydrogen production                                      | 10.1016/j.ijhydene.2008.07.096   |
| 2007                                                | Hydrogen production from diluted molasses by anaerobic hydrogen producing bacteria in an anaerobic baffled reactor (ABR)                                                                | 10.1016/j.ijhydene.2007.04.023   |
| 2007                                                | Enhancement of acetate production by a novel coupled syntrophic acetogenesis with homoacetogenesis process                                                                              | 10.1016/j.procbio.2006.11.007    |
| 2007                                                | Biohydrogen production by fermentative process in continuous stirred-tank reactor                                                                                                       | 10.1080/15435070701465581        |
| 2007                                                | Production of bio-hydrogen by mesophilic anaerobic fermentation in an acid-phase sequencing batch reactor                                                                               | 10.1002/bit.21221                |
| 2007                                                | The relationship between instability of H <sub>2</sub> production and compositions of bacterial communities within a dark fermentation fluidized-bed bioreactor                         | 10.1002/bit.21299                |
| 2007                                                | Evaluation of three methods for enriching H <sub>2</sub> -producing cultures from anaerobic sludge                                                                                      | 10.1016/j.enzmictec.2006.07.033  |
| 2007                                                | Effect of fermentation temperature on hydrogen production from cow waste slurry by using anaerobic microflora within the slurry                                                         | 10.1007/s00253-006-0647-4        |
| 2007                                                | Two-phase anaerobic digestion for production of hydrogen-methane mixtures                                                                                                               | 10.1016/j.biortech.2006.09.054   |
| 2007                                                | Comparative performance of two upflow anaerobic biohydrogen-producing reactors seeded with different sludges                                                                            | 10.1016/j.ijhydene.2006.07.016   |
| 2007                                                | Biohydrogen production from cheese processing wastewater by anaerobic fermentation using mixed microbial communities                                                                    | 10.1016/j.ijhydene.2007.07.038   |
| 2007                                                | Production of hydrogen and methane from organic solid wastes by phase-separation of anaerobic process                                                                                   | 10.1016/j.biortech.2006.06.017   |
| 2007                                                | Factors affecting hydrogen production from cassava wastewater by a co-culture of anaerobic sludge and <i>Rhodospirillum rubrum</i>                                                      | NA                               |
| 2007                                                | Feasibility of hydrogen production in thermophilic mixed fermentation by natural anaerobes                                                                                              | 10.1016/j.biortech.2006.09.039   |
| 2007                                                | High hydrogen yield from a two-step process of dark- and photo-fermentation of sucrose                                                                                                  | 10.1016/j.ijhydene.2006.06.034   |
| 2007                                                | Experimental verification of various methods for biological hydrogen production                                                                                                         | 10.1016/j.ijhydene.2006.12.010   |
| 2007                                                | Biological hydrogen production from nitrogen-deficient substrates                                                                                                                       | 10.1002/bit.21279                |
| 2007                                                | Biohydrogen production from chemical wastewater treatment in biofilm configured reactor operated in periodic discontinuous batch mode by selectively enriched anaerobic mixed consortia | 10.1016/j.watres.2007.02.015     |
| 2007                                                | Biohydrogen production from chemical wastewater as substrate by selectively enriched anaerobic mixed consortia: Influence of fermentation pH and substrate composition                  | 10.1016/j.ijhydene.2007.03.015   |
| 2007                                                | Microbial community structure of ethanol type fermentation in bio-hydrogen production                                                                                                   | 10.1111/j.1462-2920.2006.01234.x |
| 2007                                                | Enhanced biohydrogen production from cornstalk wastes with acidification pretreatment by mixed anaerobic cultures                                                                       | 10.1016/j.biombioe.2006.08.004   |
| 2007                                                | Process stability and microbial community structure in anaerobic hydrogen-producing microflora from food waste containing kimchi                                                        | 10.1016/j.jbiotec.2007.07.492    |
| 2007                                                | Biohydrogen generation from beer brewery wastewater using an anaerobic contact filter                                                                                                   | 10.1094/ASBCJ-2007-0208-01       |
| 2007                                                | Assessing optimal fermentation type for bio-hydrogen production in continuous-flow acidogenic reactors                                                                                  | 10.1016/j.biortech.2006.07.026   |
| 2007                                                | Comparison of two anaerobic systems for hydrogen production from the organic fraction of municipal solid waste and synthetic wastewater                                                 | 10.1016/j.ijhydene.2006.02.034   |
| 2007                                                | Biotechnological intensification of biogas production                                                                                                                                   | 10.1007/s00253-007-1009-6        |
| 2007                                                | Production of hydrogen and methane from wastewater sludge using anaerobic fermentation                                                                                                  | 10.1016/j.ijhydene.2006.06.063   |
| 2006                                                | Biohydrogen production in continuous-flow reactor using mixed microbial culture                                                                                                         | 10.2175/106143005X89562          |
| 2006                                                | Avoiding propionic acid accumulation in the anaerobic process for biohydrogen production                                                                                                | 10.1016/j.biombioe.2005.11.010   |
| 2006                                                | Comprehensive analysis of the factors for propionic acid accumulation in acidogenic phase of anaerobic process                                                                          | 10.1080/09593332708618640        |
| 2006                                                | Temperature effects on biohydrogen production in a granular sludge bed induced by activated carbon carriers                                                                             | 10.1016/j.ijhydene.2005.04.024   |
| 2006                                                | Biohydrogen production from sucrose using base-enriched anaerobic mixed microflora                                                                                                      | 10.1016/j.procbio.2005.10.010    |
| 2006                                                | Effect of temperature and iron concentration on the growth and hydrogen production of mixed bacteria                                                                                    | 10.1016/j.ijhydene.2005.05.006   |

|      |                                                                                                                                                                       |                                |
|------|-----------------------------------------------------------------------------------------------------------------------------------------------------------------------|--------------------------------|
| 2006 | Fermentative hydrogen production and bacterial community structure in high-rate anaerobic bioreactors containing silicone-immobilized and self-flocculated sludge     | 10.1002/bit.20800              |
| 2006 | Effect of hydraulic retention time on biohydrogen production and anaerobic microbial community                                                                        | 10.1016/j.procbio.2006.05.021  |
| 2006 | Effect of substrate concentration on hydrogen production and 16S rDNA-based analysis of the microbial community in a continuous fermenter                             | 10.1016/j.procbio.2005.06.013  |
| 2006 | Biohydrogen production in granular up-flow anaerobic sludge blanket (UASB) reactors with mixed cultures under hyper-thermophilic temperature (70°C)                   | 10.1002/bit.20844              |
| 2006 | Biological hydrogen production in suspended and attached growth anaerobic reactor systems                                                                             | 10.1016/j.ijhydene.2005.09.009 |
| 2006 | Effects of initial cultivation pH on fermentative hydrogen production from xylose using natural mixed cultures                                                        | 10.1016/j.procbio.2006.01.021  |
| 2006 | Acidogenesis characteristics of natural, mixed anaerobes converting carbohydrate-rich synthetic wastewater to hydrogen                                                | 10.1016/j.procbio.2006.03.014  |
| 2006 | The production of hydrogen by dark fermentation of municipal solid wastes and slaughterhouse waste: A two-phase process                                               | 10.1016/j.jpowsour.2006.01.006 |
| 2006 | Biohydrogen generation from jackfruit peel using anaerobic contact filter                                                                                             | 10.1016/j.ijhydene.2005.06.006 |
| 2006 | Biohydrogen generation from palm oil mill effluent using anaerobic contact filter                                                                                     | 10.1016/j.ijhydene.2005.12.002 |
| 2006 | Hydrogen and methane production from household solid waste in the two-stage fermentation process                                                                      | 10.1016/j.watres.2006.03.029   |
| 2005 | Effect of inoculum conditioning on hydrogen fermentation and pH effect on bacterial community relevant to hydrogen production                                         | 10.1263/jbb.100.524            |
| 2005 | Hydrogen production in batch culture of mixed bacteria with sucrose under different iron concentrations                                                               | 10.1016/j.ijhydene.2004.05.009 |
| 2005 | Influence of NaCl on hydrogen production from glucose by anaerobic cultures                                                                                           | 10.1080/09593332608618476      |
| 2005 | Conversion of food waste into hydrogen by thermophilic acidogenesis                                                                                                   | 10.1007/s10531-004-0377-9      |
| 2005 | Continuous fermentative hydrogen production from sucrose and sugarbeet                                                                                                | 10.1016/j.ijhydene.2004.04.003 |
| 2005 | Semi-continuous solid substrate anaerobic reactors for H <sub>2</sub> production from organic waste: Mesophilic versus thermophilic regime                            | 10.1016/j.ijhydene.2004.09.016 |
| 2005 | Hydrogen generation via anaerobic fermentation of paper mill wastes                                                                                                   | 10.1016/j.biortech.2005.01.036 |
| 2005 | Synthesis of short-/medium-chain-length poly(hydroxyalkanoate) blends by mixed culture fermentation of glycerol                                                       | 10.1021/bm058005h              |
| 2004 | Roles of pH in biologic production of hydrogen and volatile fatty acids from glucose by enriched anaerobic cultures                                                   | 10.1385/ABAB:112:2:79          |
| 2004 | Hydrogen production from food waste in anaerobic mesophilic and thermophilic acidogenesis                                                                             | 10.1016/j.ijhydene.2003.09.011 |
| 2004 | Feasibility of biohydrogen production by anaerobic co-digestion of food waste and sewage sludge                                                                       | 10.1016/j.ijhydene.2004.02.018 |
| 2004 | Characteristics of anaerobic ammonia removal by a mixed culture of hydrogen producing photosynthetic bacteria                                                         | 10.1016/j.biortech.2003.12.019 |
| 2003 | The Relative Effectiveness of pH Control and Heat Treatment for Enhancing Biohydrogen Gas Production                                                                  | 10.1021/es034291y              |
| 2002 | Effect of pH on hydrogen production from glucose by a mixed culture                                                                                                   | 10.1016/S0960-8524(01)00110-9  |
| 2002 | Production of carboxylic acids from hydrolyzed corn meal by immobilized cell fermentation in a fibrous-bed bioreactor                                                 | 10.1016/S0960-8524(01)00151-1  |
| 2002 | Hydrogen production from rice winery wastewater in an upflow anaerobic reactor by using mixed anaerobic cultures                                                      | 10.1016/S0360-3199(02)00073-3  |
| 2001 | Changes in product formation and bacterial community by dilution rate on carbohydrate fermentation by methanogenic microflora in continuous flow stirred tank reactor | 10.1007/s002530100760          |
| 2001 | H <sub>2</sub> production from algal biomass by a mixed culture of <i>Rhodobium marinum</i> A-501 and <i>Lactobacillus amylovorus</i>                                 | 10.1016/S1389-1723(01)80134-1  |
| 2001 | Maximization of acetic acid production in partial acidogenesis of swine wastewater                                                                                    | 10.1002/bit.10068              |
| 1997 | Production of biodegradable thermoplastics from municipal sludge by a two-stage bioprocess                                                                            | 10.1016/S0921-3449(96)01157-3  |
